# Supplementary material for: Structural conservation of Lassa virus glycoproteins and recognition by neutralizing antibodies
Source: PubMed Central journal article supplement (PMC10242449; doi:10.1016/j.celrep.2023.112524), 2023-05-18
Supplement: mmc1.pdf [file mmc1.pdf]

**Supplemental information**

**Structural conservation of Lassa virus**

**glycoproteins and recognition**

**by neutralizing antibodies**

**Hailee R. Perrett, Philip J.M. Brouwer, Jonathan Hurtado, Maddy L. Newby, Lin Liu, Helena Müller-Kräuter, Sarah Müller Aguirre, Judith A. Burger, Joey H. Bouhuijs, Grace Gibson, Terrence Messmer, John S. Schieffelin, Aleksandar Antanasijevic, Geert-Jan Boons, Thomas Strecker, Max Crispin, Rogier W. Sanders, Bryan Briney, and Andrew B. Ward**

Supplemental Information

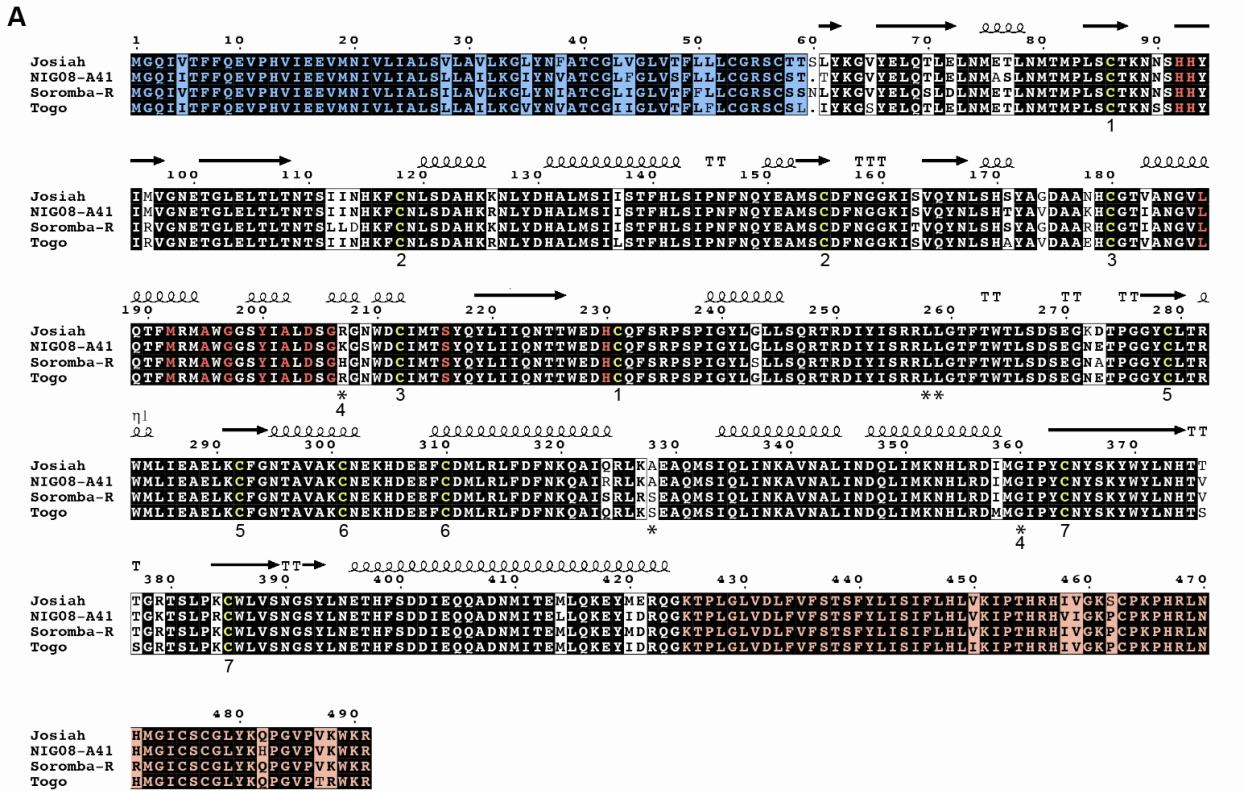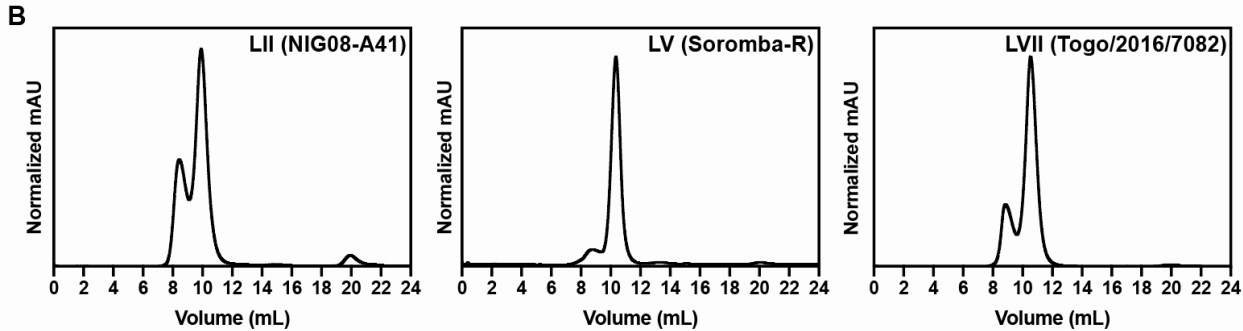

**Fig. S1: GPC lineage sequences and purification as trimers.** Related to Figure 1. (A) Native amino acid sequences from the four GPCs investigated in this study (LIV, Josiah; LII, NIG08-A41, LV, Soromba-R, and LVII, Togo) were aligned using the T-Coffee multiple sequence alignment server.<sup>1</sup> Residues shown as white text on a black background are conserved between the four strains. The stable signal peptide (SSP) is highlighted in blue and the transmembrane domain in orange. The histidine triad and additional residues required for LAMP-1 binding are highlighted in red.<sup>2,3</sup> Ectodomain residues involved in disulfide bonds are highlighted yellow and numbered below. GPCysR4 stabilizing mutation<sup>4</sup> locations are indicated with asterisks below. Secondary structural features are depicted above residues based on the atomic model for LIV GPC (PDB 8EJD). Accession codes for the sequences are as follows: Josiah, NP\_694870.1; NIG08-A41, ADU5626.1; Soromba-R, AHC95553.1; and Togo/2016/7082, AMR44577.1. Sequence alignment visualized using ESPript3.0<sup>5</sup>. (B) SEC chromatograms of LII, LV, and LVII GPC-I53-50As.

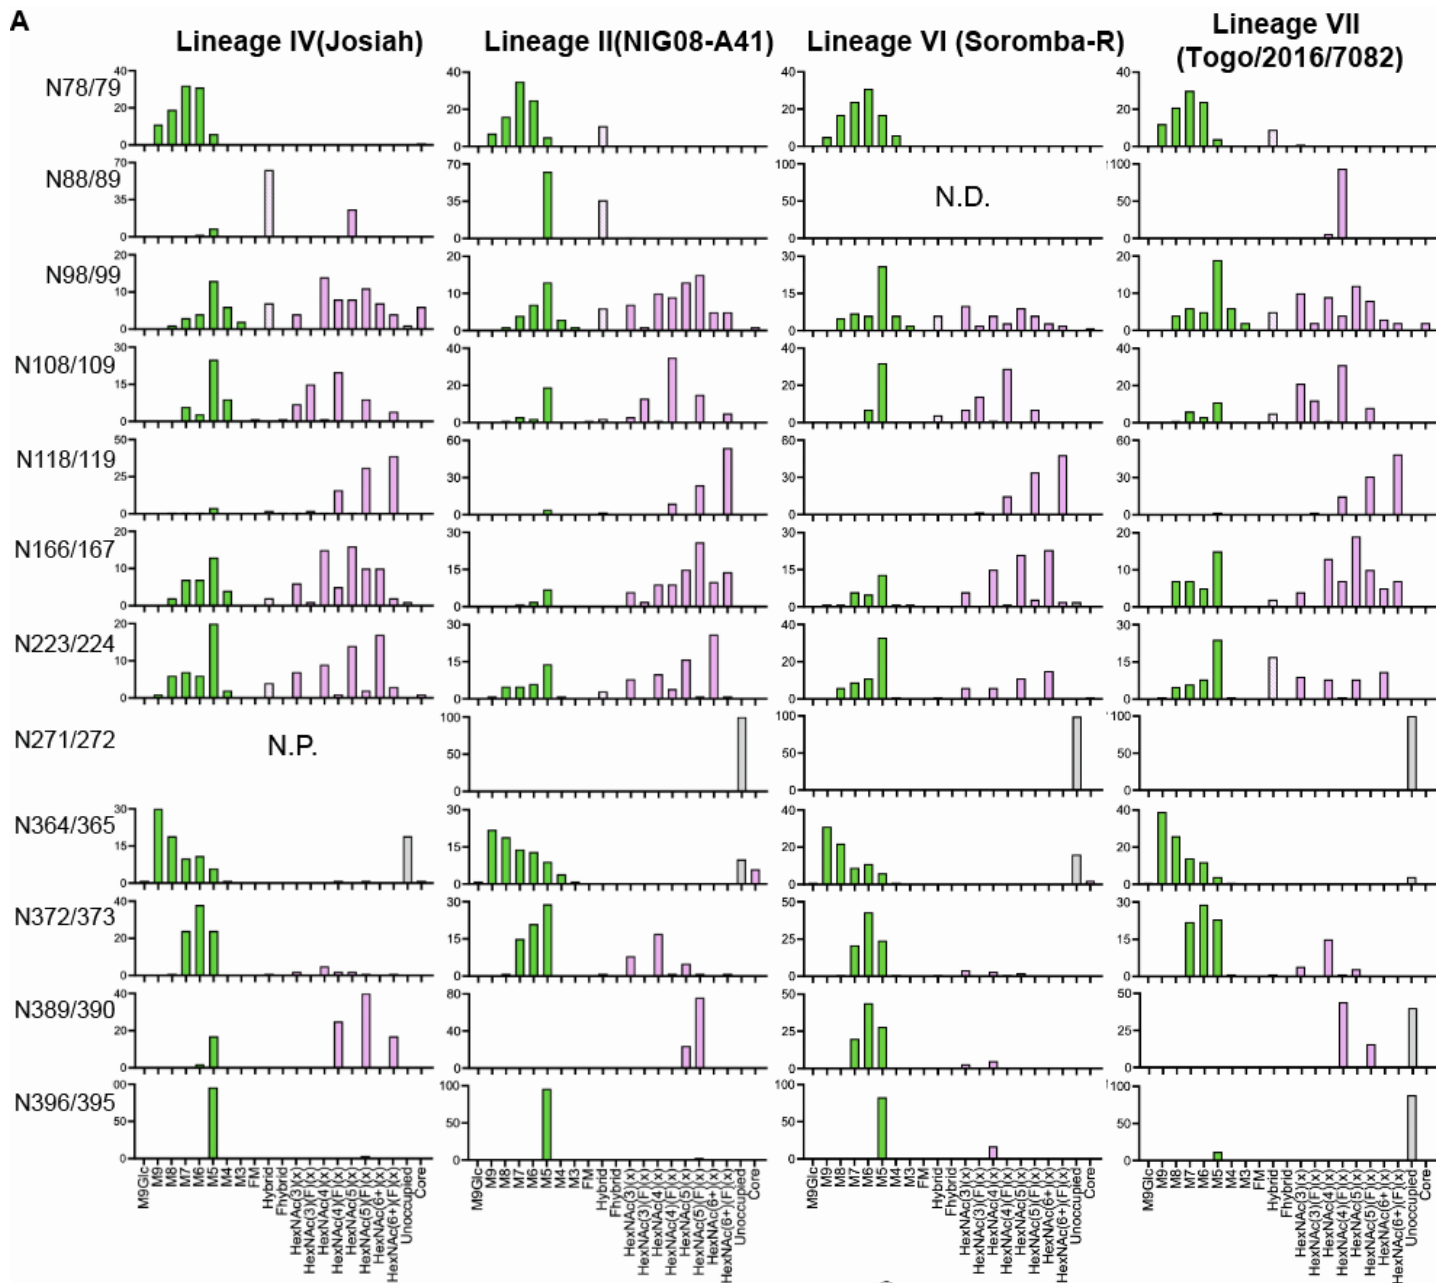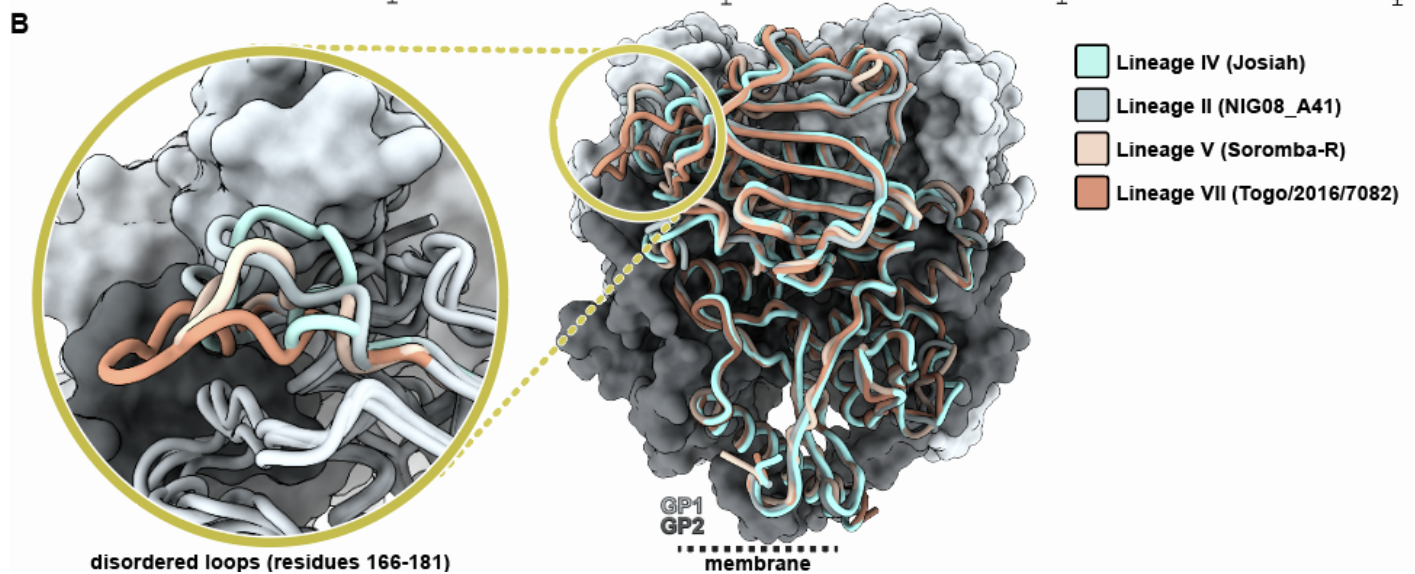

**Fig. S2: Detailed glycan analyses and further GPC structure visualization.** Related to Figure 2. (A) Quantification and identities of glycan types determined by LCMS for each PNGS of the LASV lineages. Oligomannose-type glycans are shown in green, hybrid in dashed pink, complex glycans in pink and unoccupied sites in gray. N.D. indicates a PNGS which was undetected in the assay. N.P. indicates no PNGS is present in the sequence at that site. HexNAc(2)Hex(9-5) was classified as M9 to M3. Any of these structures containing a fucose were categorized as FM (fucosylated mannose). HexNAc(3)Hex(5-6)X was classified as Hybrid with HexNAc(3)Hex(5-6)Fuc(1)X classified as Fhybrid. Complex-type glycans were classified according to the number of HexNAc subunits and the presence or absence of fucosylation. As this fragmentation method does not provide linkage information, compositional isomers are grouped. For example, a triantennary glycan contains HexNAc<sub>5</sub> but so does a biantennary glycans with a bisect. Core glycans refer to truncated structures smaller than M3. M9Glc-M4 were classified as oligomannose-type glycans. (B) Comparison of the disordered loops (LIV and LV residues 166-181; LII and LVII residues 165-180).

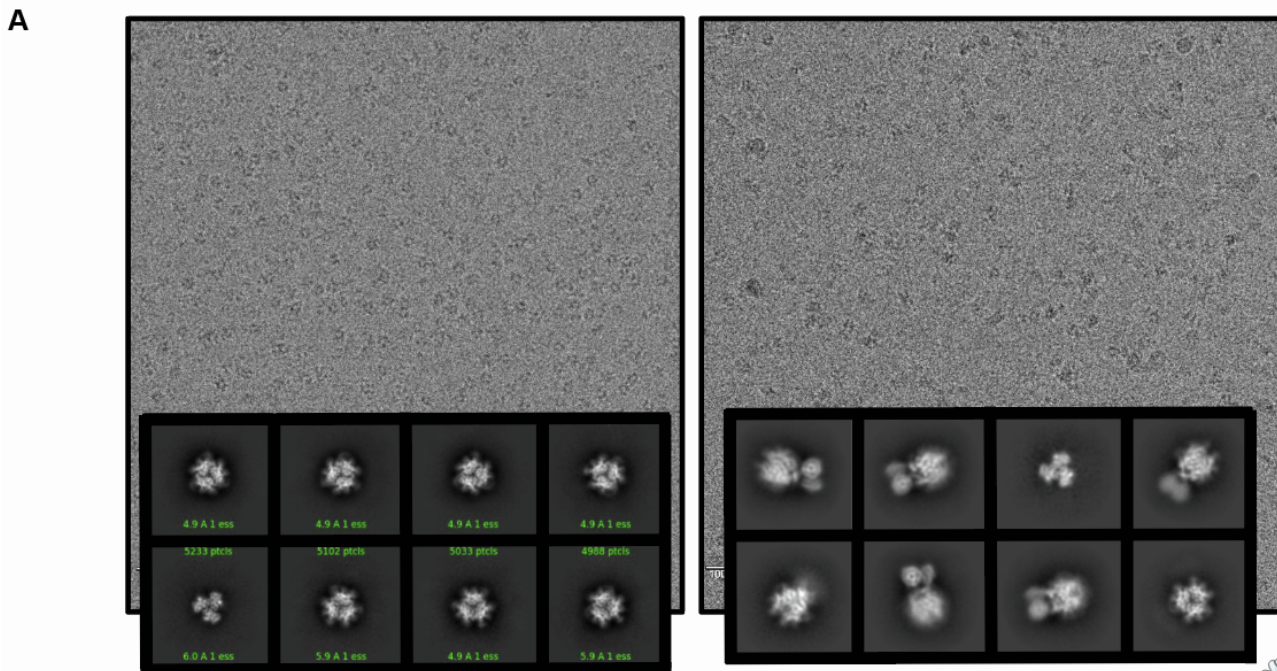

- B**
- CryoSPARC**
1. Import micrographs
  2. GCTF
  3. Template picking & particle extraction
  4. Iterative 2D classification
  5. Heterogeneous refinement with scaffold - C1 symmetry
  6. Homogeneous Refinement with scaffold- C1 symmetry
  7. 3X Local Refinement masking out scaffold - C1 symmetry

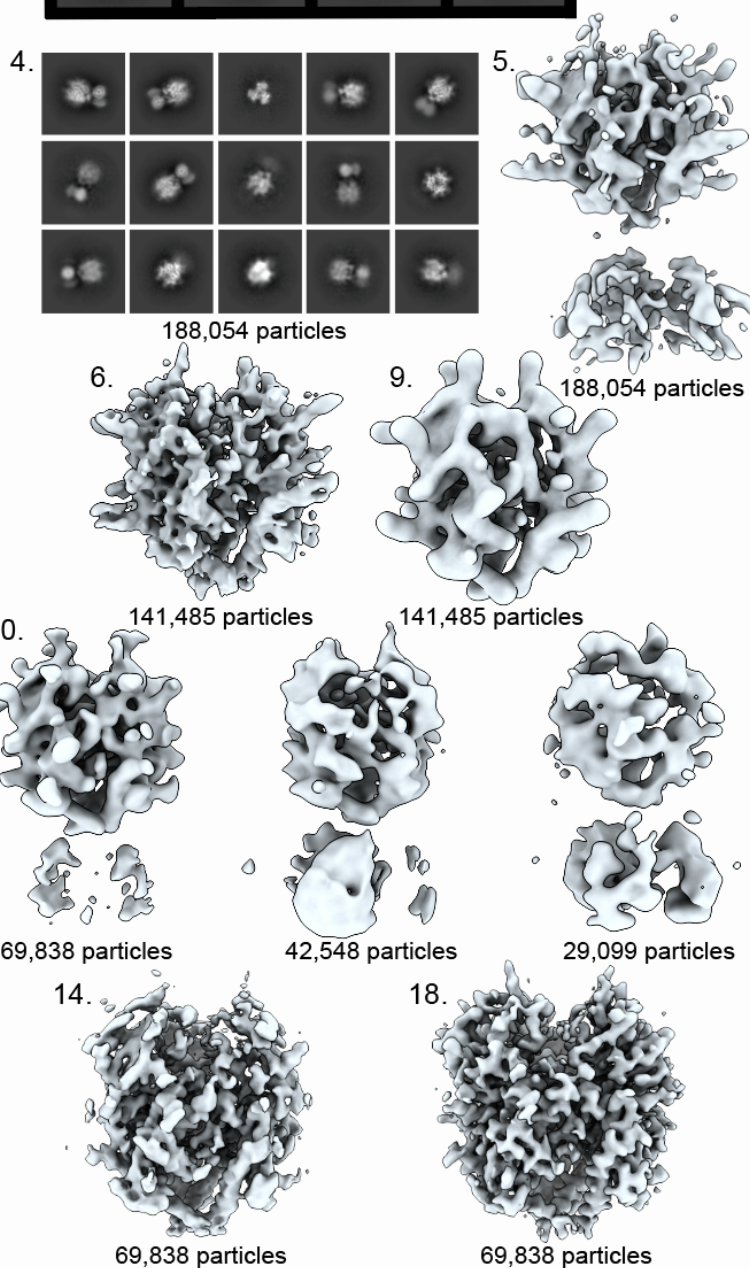

- Relion**
8. Import particles
  9. Local 3D refinement - C1 symmetry
  10. 3D Classification - 3 classes, C1 symmetry
  11. Local 3D refinement - C1 symmetry
  12. Local 3D refinement - C3 symmetry
  13. CTF Refinement
  14. Local 3D refinement - C3 symmetry

- CryoSPARC**
15. Import particles
  16. Local Refinement - C3 symmetry
  17. Global CTF Refinement
  18. Local refinement - C3 symmetry

**Fig. S3: Optimizing single-particle cryoEM for GPC samples.** Related to Figure 2. (A) Sample micrographs showing effectiveness of fluoryl-octyl maltoside in improving GPC orientation in vitreous ice (right) compared to other detergents such as LMNG (left). (B) Representative data processing overview schematic showing data from EMD-28179. A similar processing scheme was employed for EMD- 28178, EMD-28180, and EMD-28181.

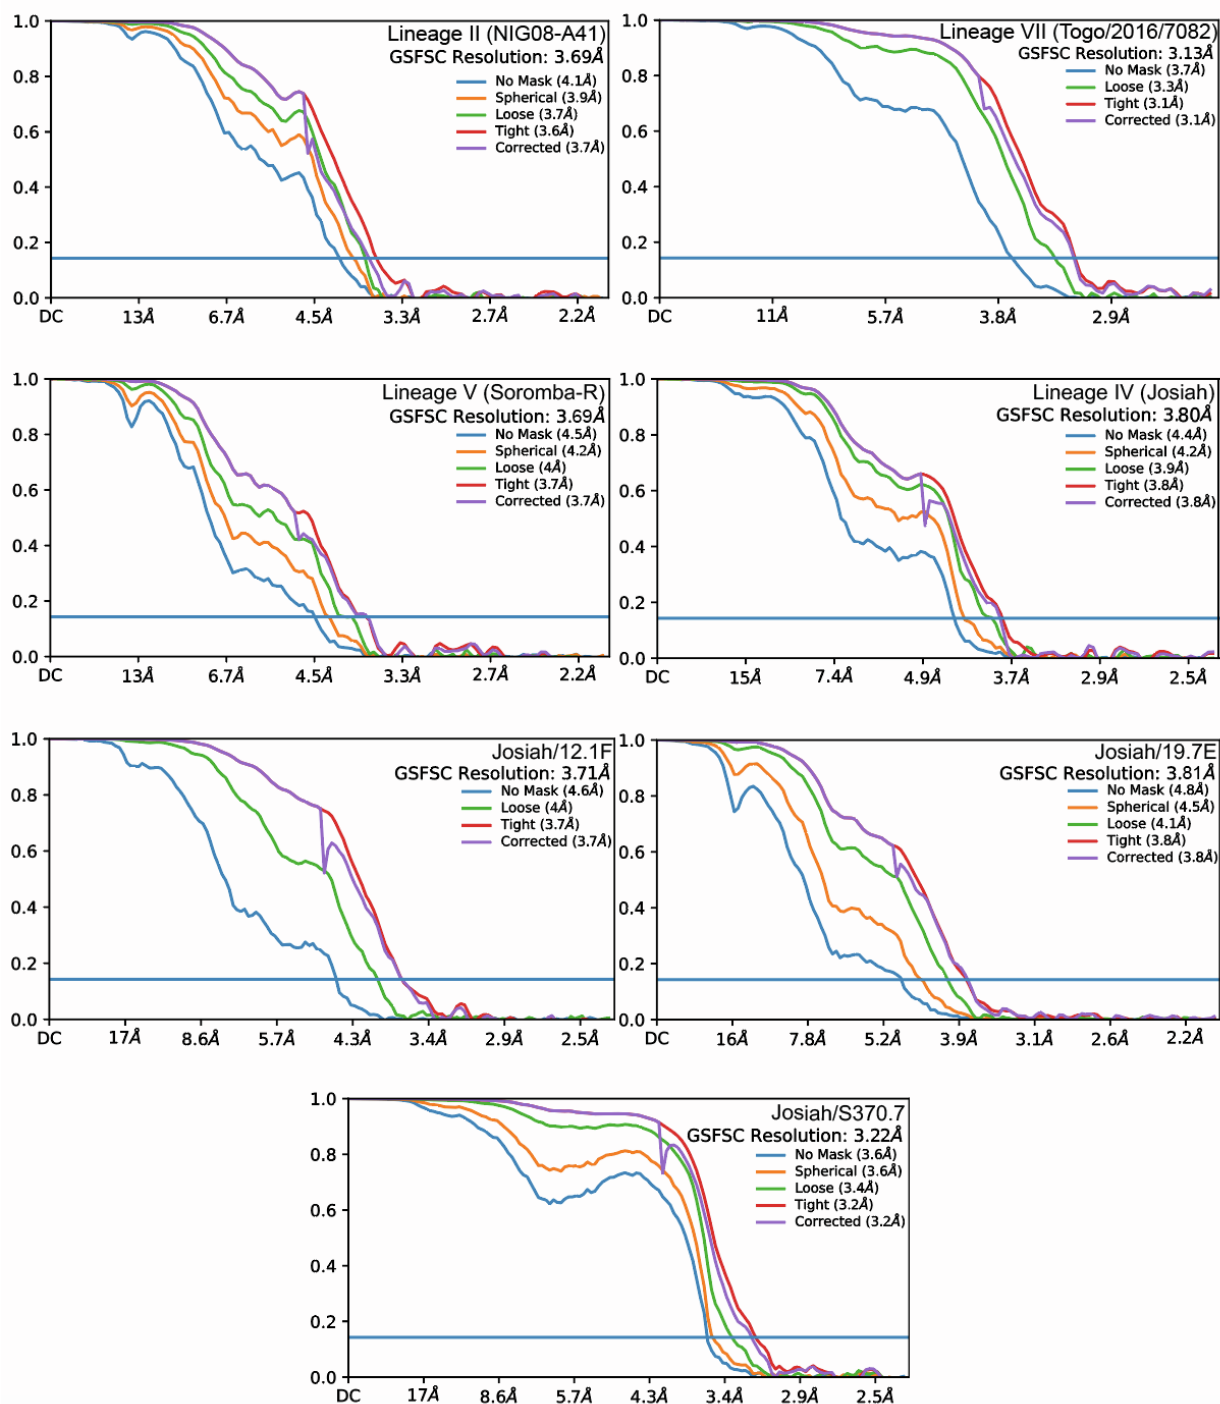

**Fig. S4: FSC plots for EM maps of LASV GPCs and GPCs bound to 12.1F, 19.7E, and S370.7.** Related to Figures 2, 4, and 6. Reported resolutions coincide with an FSC cutoff of 0.143. Plots were generated in cryoSPARC 3.2.<sup>6</sup>

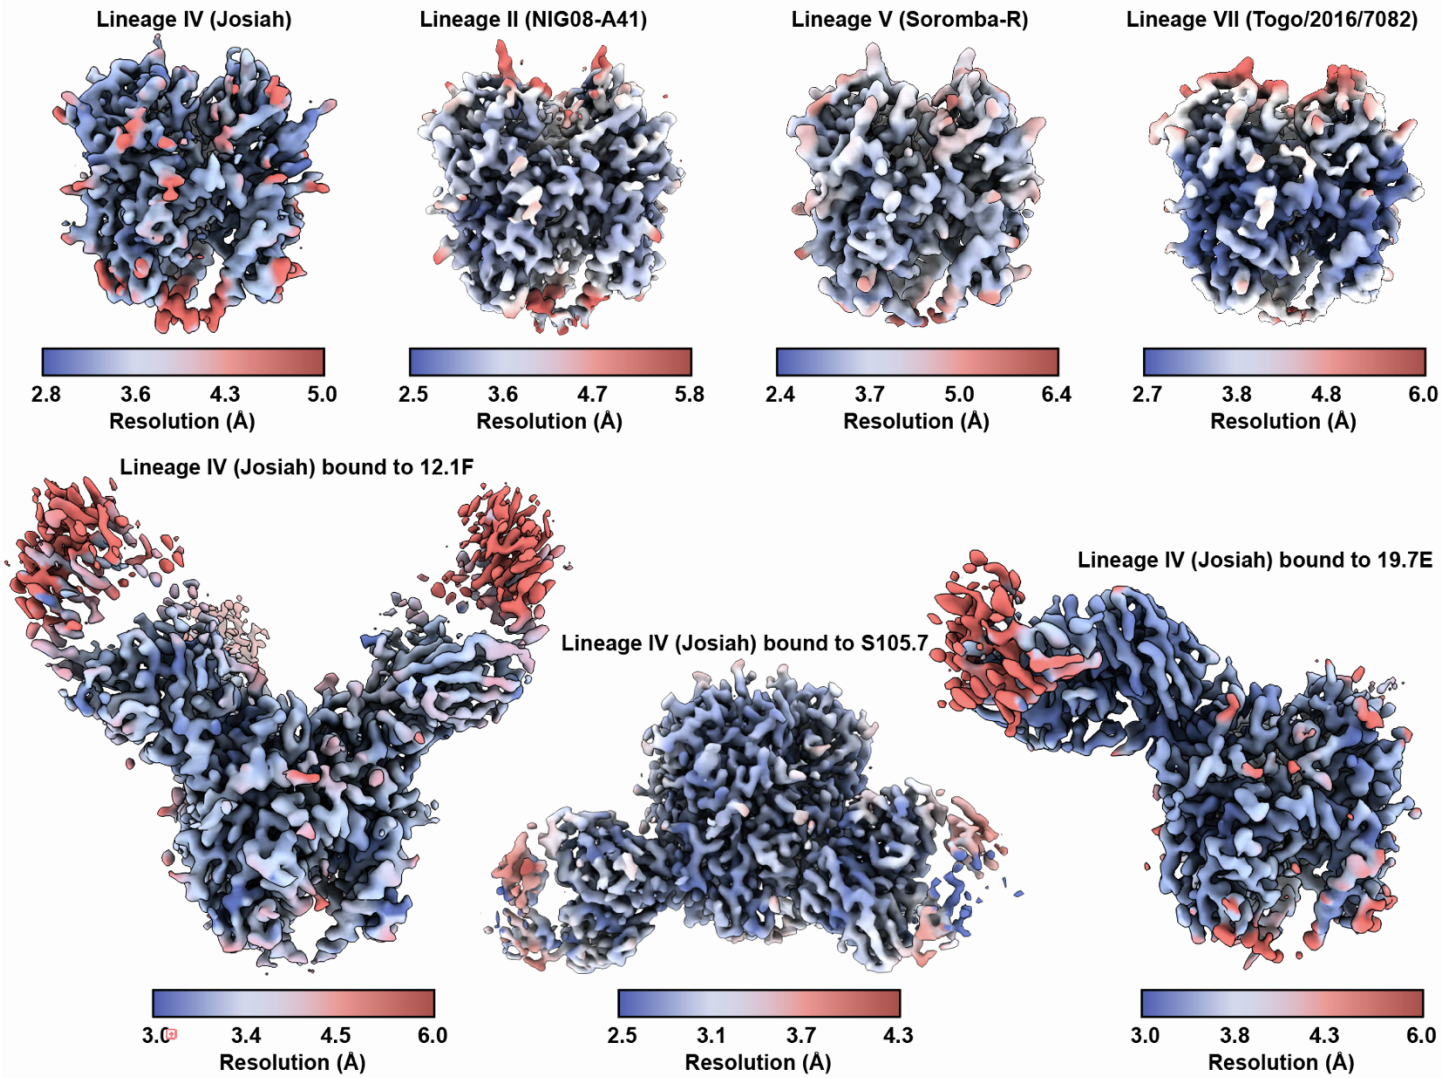

**Fig. S5: Local resolution plots for EM maps of LASV GPCs and GPCs bound to 12.1F, 19.7E, and S370.7.** Related to Figures 2, 4, and 6. Local resolution was calculated according to a 0.143 FSC threshold in cryoSPARC 3.2<sup>6</sup> and visualized in ChimeraX.<sup>7</sup>



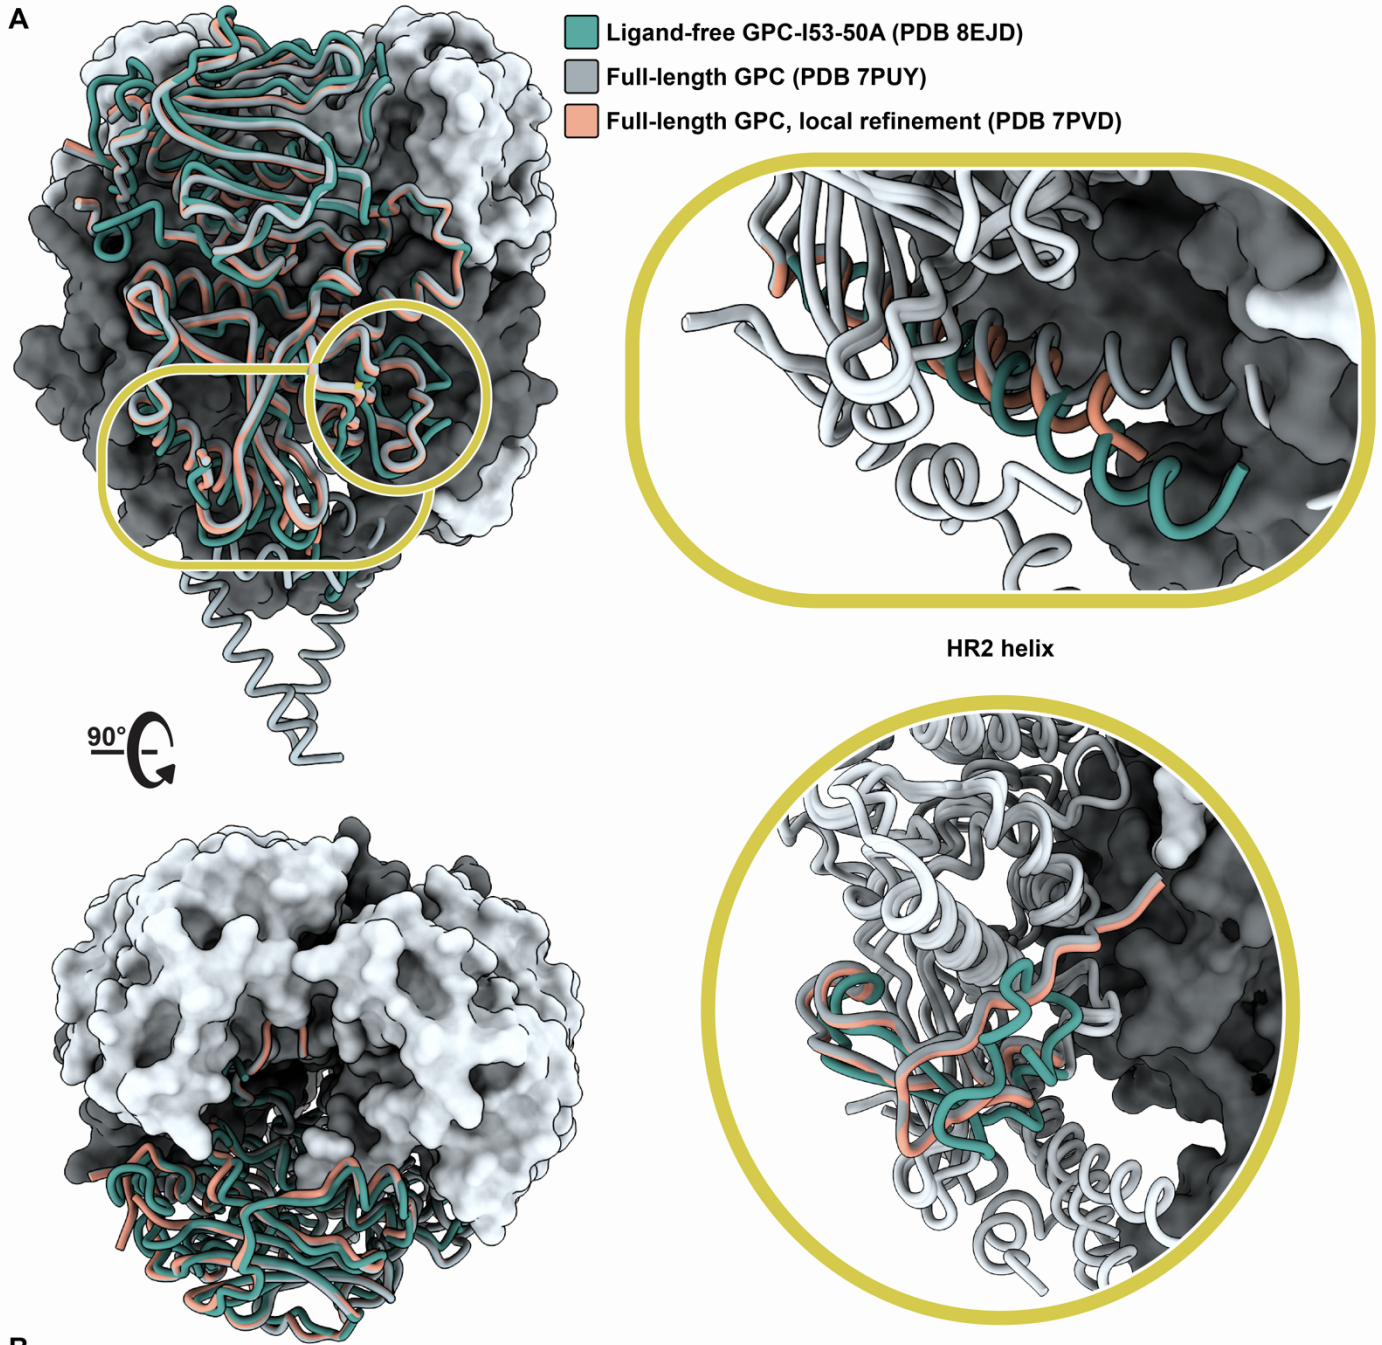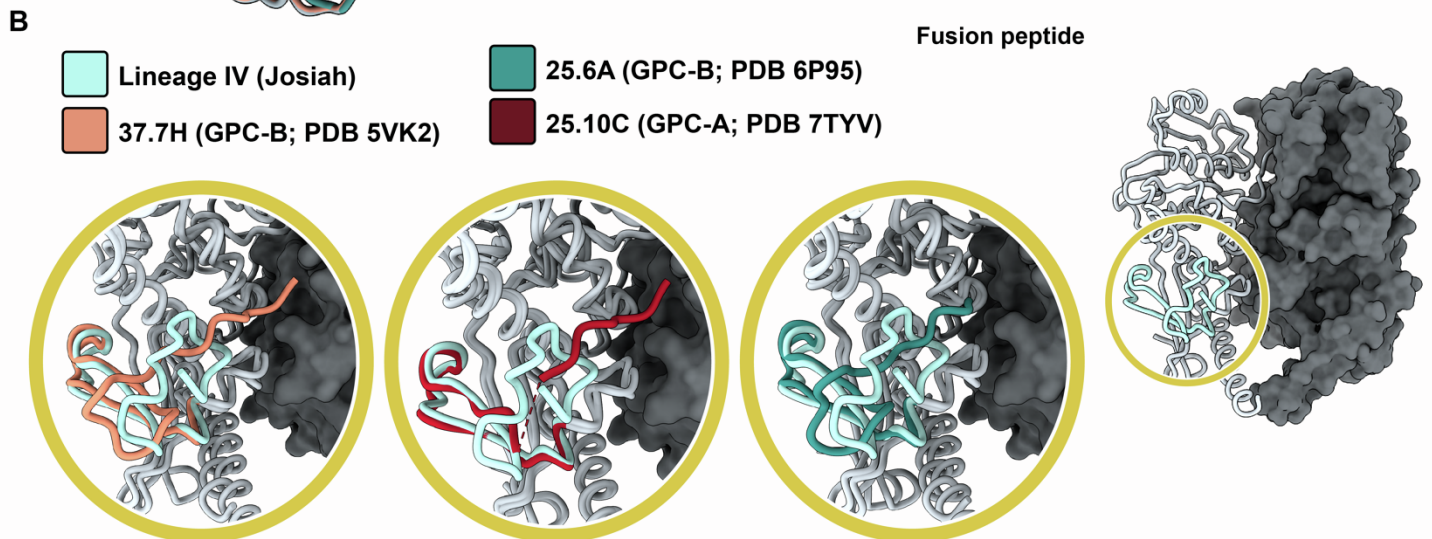

**Fig. S6: Comparison of GPC-I53-50A to full-length GPC and fusion peptide analysis.** Related to Figure 2. (A) Ligand-free LIV GPC-I53-50A (PDB 8EJD) compared to full-length, native GPC (PDBs 7PUY and 7PVD) bound to primary host cell receptor matriglycan (top left).<sup>8</sup> The apex of the GPC trimer is shown at the bottom left, where the native fusion site is modeled. Structural differences in the HR2 helix (top right) and fusion peptide (bottom right) are shown. (B) Ligand-free LIV GPC (PDB 8EJD) overlaid with additional GPC-B-specific Abs 37.7H and 25.6A and GPC-A-targeting Ab 25.10C.<sup>4,9,11</sup> The putative fusion peptides (residues 260-298) are colored for each model.

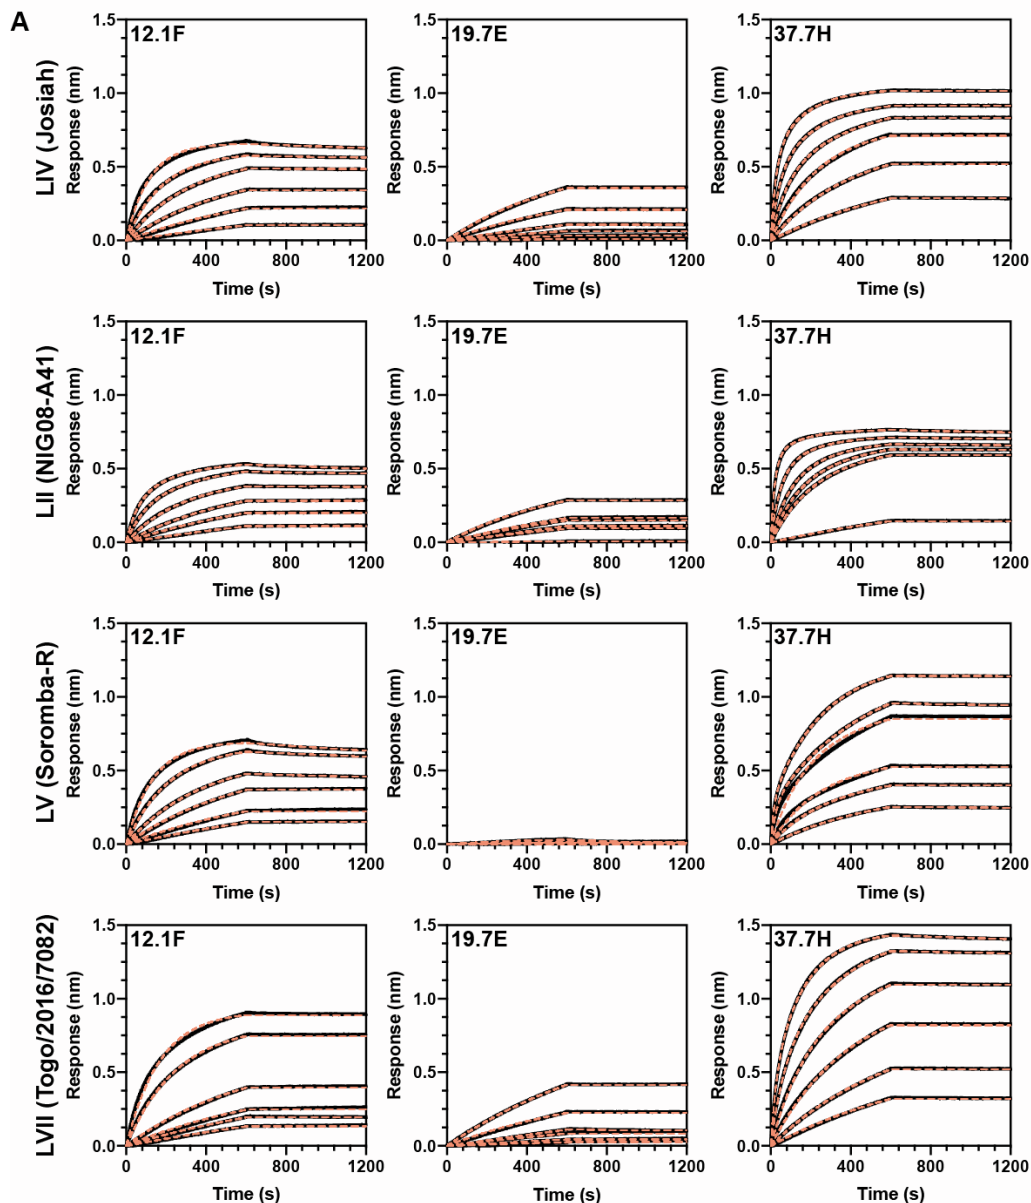

**B**

|                                     | $k_{on} (M^{-1}s^{-1})$ |                       |                       |
|-------------------------------------|-------------------------|-----------------------|-----------------------|
|                                     | 12.1F                   | 19.7E                 | 37.7H                 |
| <b>Lineage IV (Josiah)</b>          | $3.7E+04 \pm 4.9E+03$   | $1.5E+04 \pm 2.0E+03$ | $6.9E+04 \pm 4.2E+03$ |
| <b>Lineage II (NI08-A41)</b>        | $2.9E+04 \pm 2.8E+03$   | $1.3E+04 \pm 2.6E+03$ | $9.9E+04 \pm 5.0E+03$ |
| <b>Lineage V (Soromba-R)</b>        | $3.3E+04 \pm 2.2E+03$   | N/A                   | $1.4E+05 \pm 7.7E+03$ |
| <b>Lineage VII (Togo/2016/7082)</b> | $3.1E+04 \pm 2.4E+03$   | $1.3E+04 \pm 2.5E+03$ | $4.3E+04 \pm 5.7E+03$ |

**C**

|                                     | $R_{max} (nm)$ |       |       | $R_{max} : R_{max,37.7H}$ |       |       |
|-------------------------------------|----------------|-------|-------|---------------------------|-------|-------|
|                                     | 12.1F          | 19.7E | 37.7H | 12.1F                     | 19.7E | 37.7H |
| <b>Lineage IV (Josiah)</b>          | 0.68           | 0.37  | 1.02  | 0.66                      | 0.36  | 1.00  |
| <b>Lineage II (NI08-A41)</b>        | 0.53           | 0.29  | 0.76  | 0.52                      | 0.28  | 1.00  |
| <b>Lineage V (Soromba-R)</b>        | 0.71           | 0.03  | 1.15  | 0.62                      | 0.03* | 1.00  |
| <b>Lineage VII (Togo/2016/7082)</b> | 0.91           | 0.42  | 1.44  | 0.63                      | 0.29  | 1.00  |
| <b>Average</b>                      |                |       |       | 0.61                      | 0.31  | 1.00  |

\*excluded from average

**Fig. S7: Binding profiles of GPC-I53-50A trimers to NAbS 12.1F, 19.7E, and 37.7H.** Related to Figure 3. (A) BLI sensorgrams of immobilized biotinylated GPC-I53-50A binding to indicated IgGs at concentrations of 400, 200, 100, 50, 25, and 12.5 nM (black). Dotted orange lines represent the fit used to calculate on-rates and  $R_{\max}$  values. (B) Kinetics table indicating the  $k_{on}$  rates for mAbs per lineage based on data shown in (A). (C)  $R_{\max}$  values for each mAb at a concentration of 400 nM (left) and the ratios of these  $R_{\max}$  values to the  $R_{\max}$  of 37.7H (right). The  $R_{\max}:R_{\max,37.7H}$  ratio was rounded to the nearest third for the predicted binding stoichiometries indicated in Figure 3A.

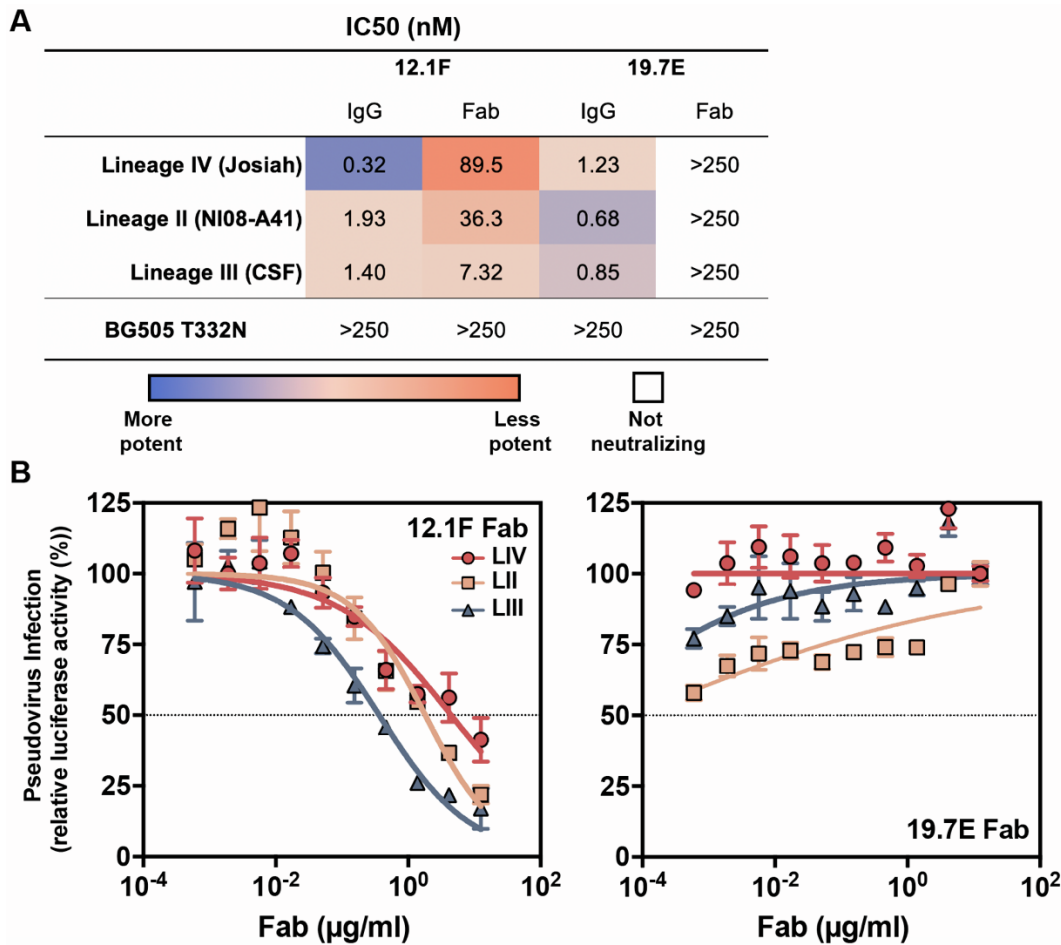

**Fig. S8: IC<sub>50</sub> summary table and Fab neutralization assays.** Related to Figure 3. (A) IC<sub>50</sub> summary table of pseudovirus neutralization using 12.1F and 19.7E, IgG and Fabs. IC<sub>50</sub> values are shown as nM concentrations. (B) Pseudovirus neutralization of LASV lineages by 12.1F and 19.7E Fab. Data points represent the mean with error bars indicating the SEM of three technical replicates.

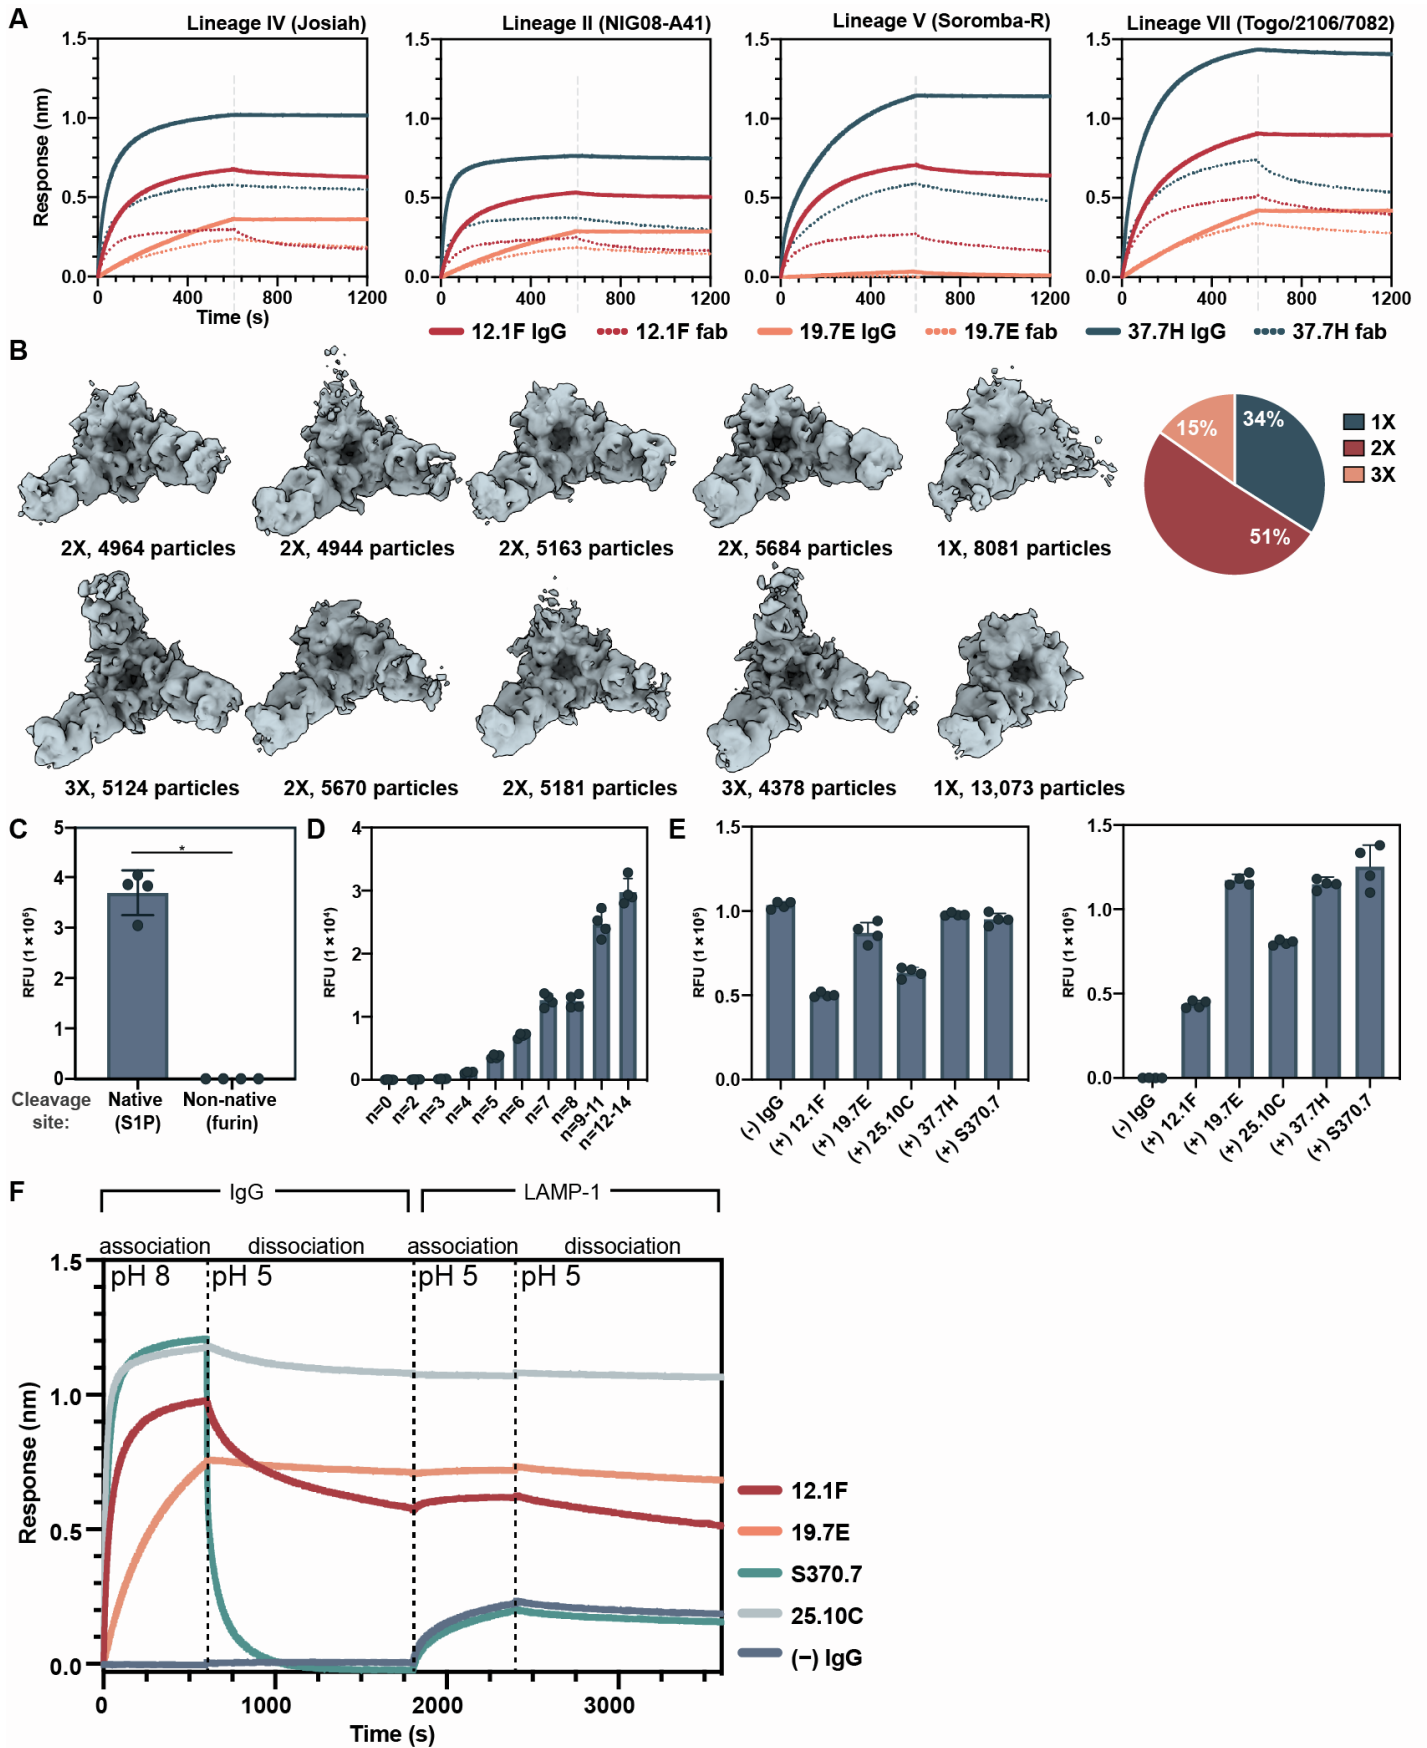

**Fig. S9: IgG versus Fab binding, and further details on the matriglycan and LAMP-1 binding assays.** Related to Figures 3, 4, and 5. (A) BLI sensorgrams indicating binding behavior of immobilized GPC-I53-50A trimer binding to 400 nM of IgG or Fab. (B) 3D classification of final particle stack used in the 12.1F-bound GPC structure (left). Particles were classified into 10 classes using a ligand-free GPC-I53-50A as the initial model. Because particles were taken from the final

reconstruction, no additional alignment was performed. The pie chart indicates the estimated distribution of GPC particles with 1, 2, or 3 12.1F Fabs bound. (C) Synthetic matriglycan microarray shows preference for GPCs featuring the native S1P cleavage site compared to the engineered furin cleavage site (median RFU of  $3.8 \times 10^5$  versus  $1.9 \times 10^2$ , respectively; two-tailed Mann-Whitney U-test;  $p = 0.029$ ). (D) GPC-I53-50As with the native S1P cleavage site show length-dependent binding to synthetic matriglycan on the microarray. Here,  $n$  indicates the number of xylose and glucuronic acid disaccharide repeating units. (E) Synthetic matriglycan assay used to distinguish the effect of bound mAbs on matriglycan binding to GPC-I53-50A with the S1P cleavage site. Bound Strep-tagged trimers were detected using a StrepMab Ab (left) to assess matriglycan binding. The StrepMab Ab is specific for the GPC-I53-50A trimer in this assay as shown by its detection using a Cy3 conjugated goat-anti-human IgG Ab (right). (F) Experimental set-up for BLI LAMP-1 competition assay shown in Fig. 3E and 5F. MAbs 25.10C, 12.1F, and S370.7 show notable dissociation at pH 5. While S370.7 completely dissociates at pH 5, the other mAbs retained some level of binding after 20 minutes at pH 5.

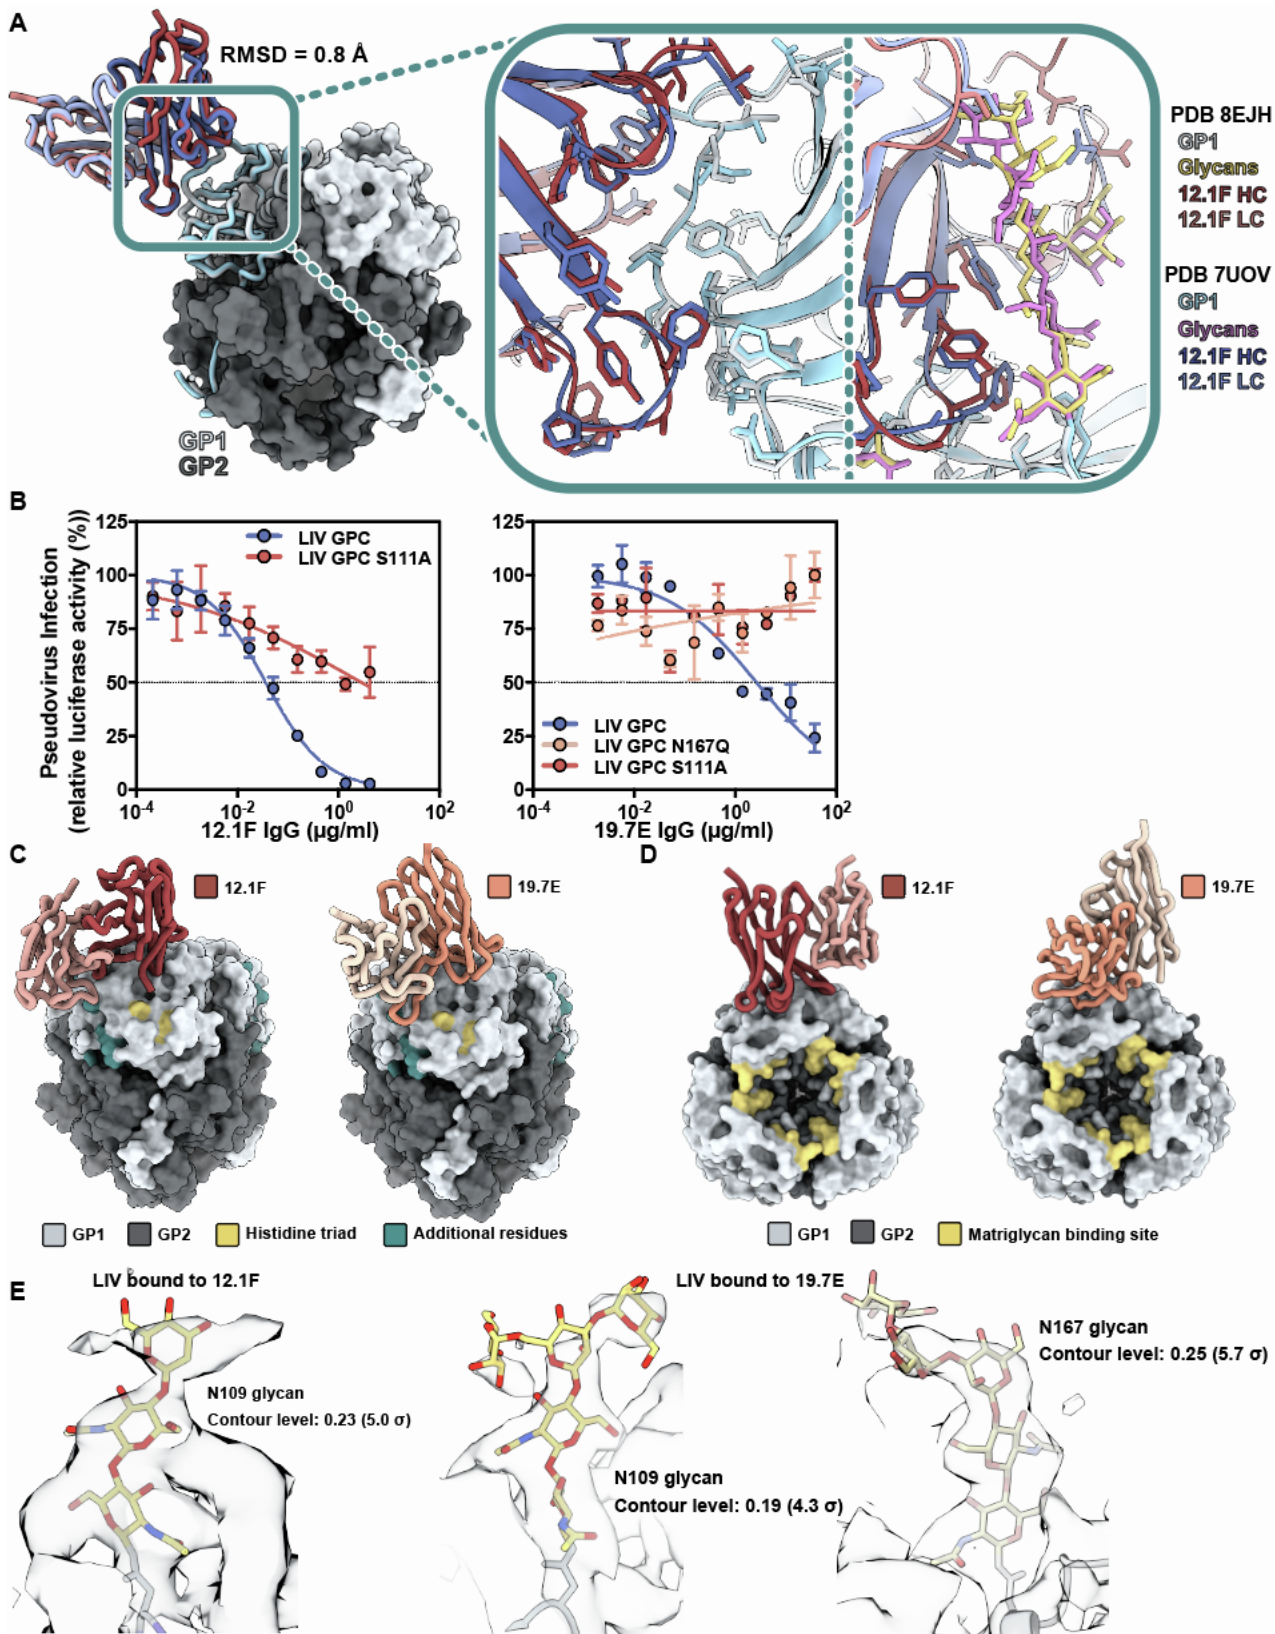

**Fig. S10: 12.1F and 19.7E glycan dependence and binding with respect to matriglycan and putative LAMP-1 binding sites.** Related to Figure 4. (A) Comparison of 12.1F-bound GPC-I53-50A with recently published 12.1F-and-37.2D-bound GPC.<sup>10</sup> Inset depicts key epitope-paratope interactions of both structures. (B) Pseudovirus neutralization of LASV lineages by indicated mAbs to LIV pseudovirus containing the glycan knockout mutations S111A or N167Q. The dotted line indicates 50% neutralization. Data points represent the mean with error bars indicating the SEM of three (12.1F) or two (19.7E) technical replicates. (C) 12.1F and 19.7E Fabs overlaid on PDB 8EJD with residues important for LAMP-1 binding<sup>2,3</sup> shown



in teal and gold. (D) 12.1F and 19.7E Fabs overlaid on PDB 8EJD with residues important for matriglycan binding shown in gold.<sup>8</sup> (E) Glycan densities in cryo-EM data for glycans required for 12.1F (left) and 19.7E (right) binding.

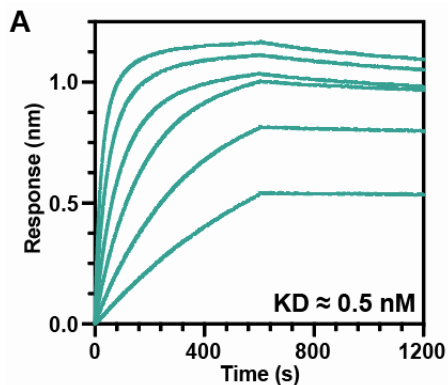

| Conc (nM) | $k_{on}$               | $KD$                  | $R^2$ |
|-----------|------------------------|-----------------------|-------|
| 50        | $1.1E+05 \pm 1.7E+02$  | $3.0E-10 \pm 4.0E-12$ | 0.990 |
| 25        | $1.19E+05 \pm 1.3E+02$ | $1.3E-10 \pm 1.3E-12$ | 0.998 |
| 12.5      | $1.5E+05 \pm 1.4E+03$  | N/A                   | 0.995 |

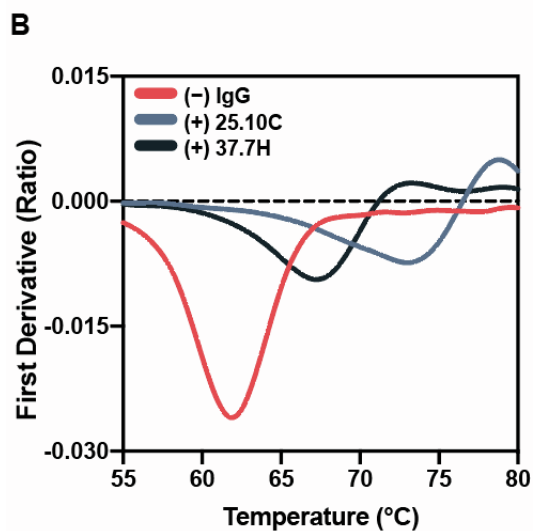

**C**

| Replicate                               | 1   | 2   | 3   | 4   |
|-----------------------------------------|-----|-----|-----|-----|
| Neutralizing titer ( $\mu\text{g/mL}$ ) | >20 | >20 | >20 | >20 |

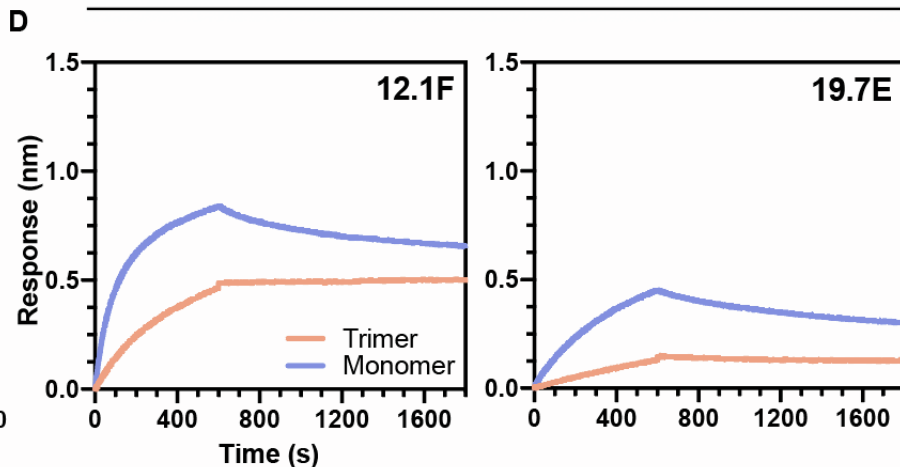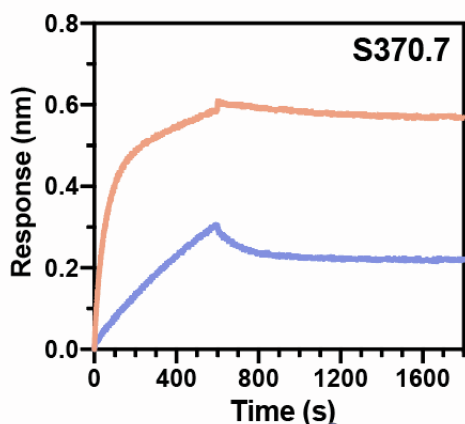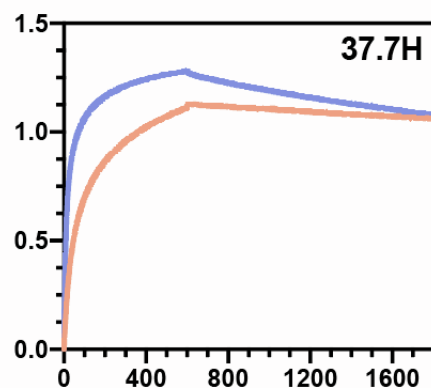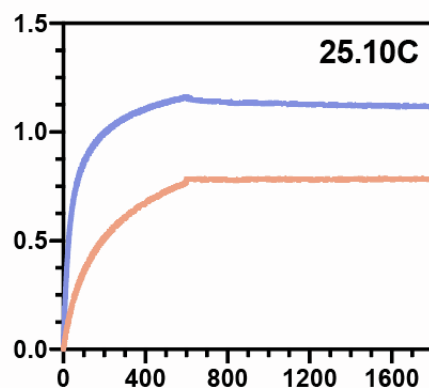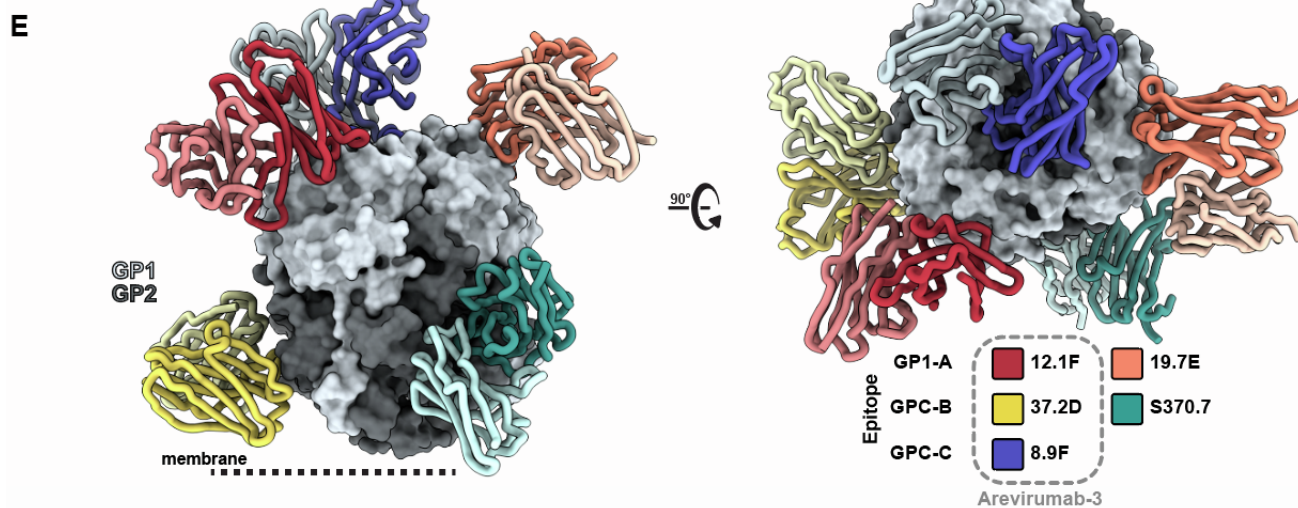

**Fig. S11: Biophysical comparison of S370.7 to known nAbs.** Related to Figure 6. (A) BLI sensorgrams (left) of immobilized biotinylated LIV GPC-I53-50A binding to S370.7 at concentrations of 400, 200, 100, 50, 25, and 12.5 nM (black). Kinetics table (right) featuring values derived from 1:1 binding model fitting of the raw data that best fit a 1:1 binding model. (B) Thermostability of LIV GPC-I53-50A and LIV GPC-I53-50A in complex with 25.10C or 37.7H Fabs assessed by nanoDSF. Each melting curve is a representative of triplicate curves. (C) Endpoint neutralization titers against authentic, LIV strain Josiah virus. (D) BLI sensorgrams comparing immobilized IgG binding to GPC-I53-50A trimer or GPC monomer. Trimer and monomer were diluted to 150 and 450 nM, respectively, which represents equivalent concentrations of protomer. (E) Comparison of epitopes targeted by S370.7 and 19.7E with those in the Arevirumab-3 cocktail containing 12.1F, 8.9F, and 37.2D (PDBs 7UOT and 7UOV).<sup>10</sup>

**Table S1: CryoEM map and atomic model refinement.** Related to Fig. 2, 4, and 6.

|                                                     | Lineage IV<br>(Josiah) | Lineage II<br>(NIG08-A41) | Lineage V<br>(Soromba-<br>R) | Lineage VI<br>(Togo/2016/<br>7082) | Josiah<br>bound to<br>12.1F fab | Josiah<br>bound to<br>19.7E fab | Josiah<br>bound to<br>S370.7 fab |
|-----------------------------------------------------|------------------------|---------------------------|------------------------------|------------------------------------|---------------------------------|---------------------------------|----------------------------------|
| <b>Access codes</b>                                 |                        |                           |                              |                                    |                                 |                                 |                                  |
| PDB                                                 | 8EJD                   | 8EJE                      | 8EJF                         | 8EJG                               | 8EJH                            | 8EJI                            | 8EJJ                             |
| EMDB                                                | EMD-28178              | EMD-28179                 | EMD-28180                    | EMD-28181                          | EMD-28182                       | EMD-28183                       | EMD-28184                        |
| Genebank                                            | NP_694870.1            | ADU56626.1                | AHC95553.1                   | AMR44577.1                         | NP_694870.1                     | NP_694870.1                     | NP_694870.1                      |
| <b>Data collection and processing</b>               |                        |                           |                              |                                    |                                 |                                 |                                  |
| Microscope                                          | Talos Arctica          | Titan Krios               | Titan Krios                  | Talos Arctica                      | Talos Arctica                   | Titan Krios                     | Talos Arctica                    |
| Magnification                                       | 36,000                 | 130,000                   | 130,000                      | 36,000                             | 36,000                          | 130,000                         | 36000                            |
| Voltage (kV)                                        | 200                    | 300                       | 300                          | 200                                | 200                             | 300                             | 200                              |
| Electron exposure (e <sup>-</sup> /Å <sup>2</sup> ) | 50.0                   | 49.2                      | 49.2                         | 50.3                               | 50.3                            | 50.2                            | 50.1                             |
| Defocus range (µm)                                  | -0.7 to -2             | -0.7 to -2                | -0.7 to -2                   | -0.7 to -2                         | -0.7 to -2                      | -0.7 to -2                      | -0.7 to -2                       |
| Pixel size (Å)                                      | 1.150                  | 1.045                     | 1.045                        | 1.150                              | 1.150                           | 1.045                           | 1.150                            |
| Imposed Symmetry                                    | C3                     | C3                        | C3                           | C3                                 | C3                              | C1                              | C3                               |
| Final particle number                               | 56,496                 | 69,838                    | 27,663                       | 71,504                             | 62,262                          | 70,071<br>(symmetry expanded)   | 96,449                           |
| Map resolution (Å)                                  | 3.8                    | 3.7                       | 3.7                          | 3.1                                | 3.7                             | 3.8                             | 3.2                              |
| FSC Threshold                                       | 0.143                  | 0.143                     | 0.143                        | 0.143                              | 0.143                           | 0.143                           | 0.143                            |
| Map sharpening B-factor (Å <sup>2</sup> )           | -70                    | -93                       | -67                          | -50                                | -130                            | -120                            | -63                              |
| <b>Model refinement and validation</b>              |                        |                           |                              |                                    |                                 |                                 |                                  |
| Total Residues                                      | 1173                   | 1134                      | 1170                         | 1185                               | 1860                            | 1335                            | 1830                             |
| Amino-acids                                         | 1086                   | 1068                      | 1080                         | 1083                               | 1761                            | 1257                            | 1743                             |
| Carbohydrates                                       | 87                     | 66                        | 90                           | 102                                | 99                              | 78                              | 87                               |
| RMSD Bonds                                          | 0.021                  | 0.022                     | 0.023                        | 0.024                              | 0.020                           | 0.021                           | 0.023                            |
| RMSD Angles                                         | 1.78                   | 2.11                      | 1.95                         | 1.87                               | 1.75                            | 1.81                            | 1.77                             |
| <b>Ramachandran</b>                                 |                        |                           |                              |                                    |                                 |                                 |                                  |
| Outliers (%)                                        | 0                      | 0                         | 0                            | 0                                  | 0                               | 0                               | 0                                |
| Allowed (%)                                         | 4.5                    | 6.0                       | 9.0                          | 6.4                                | 5.7                             | 3.9                             | 2.8                              |
| Favored (%)                                         | 95.5                   | 94.0                      | 91.0                         | 93.6                               | 94.3                            | 96.1                            | 97.2                             |
| Rotamer outliers (%)                                | 0                      | 0                         | 0                            | 0                                  | 0                               | 0                               | 0                                |
| Clash score                                         | 2.04                   | 2.39                      | 1.89                         | 0.88                               | 2.50                            | 3.31                            | 1.73                             |
| Molprobrity score                                   | 1.29                   | 1.42                      | 1.47                         | 1.19                               | 1.42                            | 1.40                            | 1.08                             |
| FSC model (0/0.143/0.5)                             | 3.3/3.7/4.1            | 3.3/3.5/3.8               | 3.5/3.7/4.2                  | 3.0/3.2/3.4                        | 3.3/3.5/3.9                     | 3.3/3.6/4.0                     | 2.9/3.1/3.4                      |
| EMRinger score                                      | 2.51                   | 2.46                      | 2.04                         | 3.32                               | 2.12                            | 2.44                            | 3.74                             |

**Table S2: 12.1F antibody interactions with GP1.** Related to Figure 4. Amino acid interactions at the 12.1F epitope-paratope were determined using the online-based Epitope Analyzer platform<sup>12</sup>. Glycan contacts were assessed by finding close contacts (<4 Å) of the GPC glycans with 12.1F Fab using ChimeraX.<sup>7</sup>

| GP Residue number          | Amino acid | Atom    | Fab Residue number | Amino Acid | Heavy or light chain | Distance (Å) | Interaction Type |
|----------------------------|------------|---------|--------------------|------------|----------------------|--------------|------------------|
| 91                         | SER        | CB-CD2  | 111.1              | PHE        | H                    | 3.4          | Van-der-Waals    |
| 92                         | HIS        | CE1-CD2 | 111.1              | PHE        | H                    | 3.9          | Van-der-Waals    |
| 107                        | LEU        | O-CD2   | 111.1              | PHE        | H                    | 3.8          | Van-der-Waals    |
| 108                        | THR        | C-O     | 111                | GLY        | H                    | 3.5          | Van-der-Waals    |
| 108                        | THR        | CG2-CE2 | 111.1              | PHE        | H                    | 3.7          | Van-der-Waals    |
| 109                        | ASN        | CA-O    | 111                | GLY        | H                    | 3.9          | Van-der-Waals    |
| 109                        | ASN        | N-O     | 111                | GLY        | H                    | 2.9          | Hydro-Bond       |
| 110                        | THR        | CG2-CA  | 111                | GLY        | H                    | 3.9          | Van-der-Waals    |
| 110                        | THR        | CG2-CB  | 109                | SER        | H                    | 3.8          | Van-der-Waals    |
| 111                        | SER        | O-CE2   | 38                 | PHE        | H                    | 3.9          | Van-der-Waals    |
| 112                        | ILE        | C-ND2   | 57                 | ASN        | H                    | 3.7          | Van-der-Waals    |
| 112                        | ILE        | C-OG    | 64                 | SER        | H                    | 3.6          | Van-der-Waals    |
| 112                        | ILE        | CG2-CD1 | 59                 | LEU        | H                    | 3.5          | Hydr-Phbc        |
| 112                        | ILE        | O-ND2   | 57                 | ASN        | H                    | 2.8          | Hydro-Bond       |
| 112                        | ILE        | O-OG    | 64                 | SER        | H                    | 2.7          | Hydro-Bond       |
| 113                        | ILE        | C-OG    | 64                 | SER        | H                    | 3.4          | Van-der-Waals    |
| 113                        | ILE        | N-OG    | 64                 | SER        | H                    | 3.9          | Hydro-Bond       |
| 114                        | ASN        | CA-OG   | 64                 | SER        | H                    | 3.6          | Van-der-Waals    |
| 114                        | ASN        | CB-O    | 65                 | THR        | H                    | 3.6          | Van-der-Waals    |
| 114                        | ASN        | N-OG    | 64                 | SER        | H                    | 2.7          | Hydro-Bond       |
| 114                        | ASN        | ND2-O   | 65                 | THR        | H                    | 2.9          | Hydro-Bond       |
| 156                        | ASP        | CG-CD1  | 59                 | LEU        | H                    | 3.6          | Van-der-Waals    |
| 217                        | TYR        | CE2-N   | 111.2              | ALA        | H                    | 3.6          | Van-der-Waals    |
| 217                        | TYR        | OH-C    | 111.1              | PHE        | H                    | 4.0          | Van-der-Waals    |
| 217                        | TYR        | OH-N    | 111.2              | ALA        | H                    | 2.9          | Hydro-Bond       |
| 110                        | THR        | C-OD1   | 109                | ASP        | L                    | 4.0          | Van-der-Waals    |
| 111                        | SER        | CB-NE1  | 114                | TRP        | L                    | 4.0          | Van-der-Waals    |
| 111                        | SER        | CB-OD1  | 109                | ASP        | L                    | 3.6          | Van-der-Waals    |
| 111                        | SER        | N-OD1   | 109                | ASP        | L                    | 3.4          | Hydro-Bond       |
| 111                        | SER        | OG-NE1  | 114                | TRP        | L                    | 2.6          | Hydro-Bond       |
| 111                        | SER        | OG-OD1  | 109                | ASP        | L                    | 2.8          | Hydro-Bond       |
| 111                        | SER        | OG-OD2  | 109                | ASP        | L                    | 3.5          | Hydro-Bond       |
| 112                        | ILE        | C-CZ2   | 114                | TRP        | L                    | 3.8          | Van-der-Waals    |
| 114                        | ASN        | CB-CD2  | 114                | TRP        | L                    | 3.8          | Van-der-Waals    |
| 114                        | ASN        | OD1-NE1 | 114                | TRP        | L                    | 3.4          | Hydro-Bond       |
| 219                        | TYR        | OH-CG   | 109                | ASP        | L                    | 3.6          | Van-der-Waals    |
| 219                        | TYR        | OH-OD1  | 109                | ASP        | L                    | 3.9          | Hydro-Bond       |
| 219                        | TYR        | OH-OD2  | 109                | ASP        | L                    | 3.0          | Hydro-Bond       |
| N89 glycan, O3-C1 Man      |            | O6-CB   | 4                  | LEU        | H                    | 3.7          | -                |
| N89 glycan, O3-C1 Man      |            | O6-CG   | 4                  | LEU        | H                    | 3.8          | -                |
| N89 glycan, O3-C1 Man      |            | O6-CD1  | 4                  | LEU        | H                    | 3.9          | -                |
| N89 glycan, O3-C1 Man      |            | O6-N    | 4                  | LEU        | H                    | 3.7          | -                |
| N89 glycan, O3-C1 Man      |            | O6-OE2  | 28                 | GLU        | H                    | 2.8          | -                |
| N89 glycan, O3-C1 Man      |            | C6-OE2  | 28                 | GLU        | H                    | 3.5          | -                |
| N89 glycan, O3-C1 Man      |            | O6-CB   | 28                 | GLU        | H                    | 3.6          | -                |
| N89 glycan, O3-C1 Man      |            | OG-CG   | 28                 | GLU        | H                    | 3.8          | -                |
| N89 glycan, O3-C1 Man      |            | C6-CG   | 28                 | GLU        | H                    | 4.0          | -                |
| N89 glycan, O3-C1 Man      |            | O5-OG   | 29                 | SER        | H                    | 3.2          | -                |
| N89 glycan, O3-C1 Man      |            | C6-CB   | 29                 | SER        | H                    | 3.6          | -                |
| N89 glycan, O3-C1 Man      |            | C6-OG   | 29                 | SER        | H                    | 3.9          | -                |
| N89 glycan, O3-C1 Man      |            | O5-CB   | 29                 | SER        | H                    | 3.7          | -                |
| N89 glycan, O4-C1 Man      |            | O3-CZ   | 37                 | PHE        | H                    | 3.7          | -                |
| N89 glycan, O4-C1 GlcNAc   |            | O4-OH   | 108                | TYR        | H                    | 2.9          | -                |
| N89 glycan, O4-C1 GlcNAc   |            | O3-OH   | 108                | TYR        | H                    | 3.1          | -                |
| N89 glycan, O4-C1 Man      |            | O2-CE1  | 108                | TYR        | H                    | 3.2          | -                |
| N89 glycan, O4-C1 Man      |            | O2-CZ   | 108                | TYR        | H                    | 3.3          | -                |
| N89 glycan, O4-C1 GlcNAc   |            | O4-CZ   | 108                | TYR        | H                    | 3.4          | -                |
| N89 glycan, O4-C1 Man      |            | O2-CD1  | 108                | TYR        | H                    | 3.5          | -                |
| N89 glycan, O4-C1 Man      |            | O2-CE2  | 108                | TYR        | H                    | 3.7          | -                |
| N89 glycan, O4-C1 Man      |            | O2-OH   | 108                | TYR        | H                    | 3.8          | -                |
| N89 glycan, O4-C1 Man      |            | O2-CD2  | 108                | TYR        | H                    | 4.0          | -                |
| N89 glycan, O4-C1 GlcNAc   |            | C4-OH   | 108                | TYR        | H                    | 3.3          | -                |
| N89 glycan, O4-C1 GlcNAc   |            | O4-CE2  | 108                | TYR        | H                    | 3.7          | -                |
| N89 glycan, O4-C1 GlcNAc   |            | C3-OH   | 108                | TYR        | H                    | 3.8          | -                |
| N89 glycan, O4-C1 Man      |            | O2-CG2  | 108                | TYR        | H                    | 3.9          | -                |
| N89 glycan, O4-C1 GlcNAc   |            | O3-CZ   | 108                | TYR        | H                    | 3.9          | -                |
| N89 glycan, ND2-C1 GlcNAc  |            | O3-OH   | 110                | TYR        | H                    | 2.9          | -                |
| N89 glycan, ND2-C1 GlcNAc  |            | O3-CZ   | 110                | TYR        | H                    | 3.6          | -                |
| N89 glycan, ND2-C1 GlcNAc  |            | O7-OH   | 110                | TYR        | H                    | 3.2          | -                |
| N89 glycan, ND2-C1 GlcNAc  |            | O3-CE1  | 110                | TYR        | H                    | 3.5          | -                |
| N89 glycan, ND2-C1 GlcNAc  |            | C7-OH   | 110                | TYR        | H                    | 3.7          | -                |
| N89 glycan, O4-C1 GlcNAc   |            | C6-CE1  | 110                | TYR        | H                    | 3.7          | -                |
| N89 glycan, ND2-C1 GlcNAc  |            | N2-OH   | 110                | TYR        | H                    | 3.9          | -                |
| N109 glycan, ND2-C1 GlcNAc |            | C8-O    | 111.2              | ALA        | H                    | 3.0          | -                |
| N109 glycan, ND2-C1 GlcNAc |            | O7-O    | 111.2              | ALA        | H                    | 2.9          | -                |
| N109 glycan, ND2-C1 GlcNAc |            | O7-O    | 111.2              | ALA        | H                    | 3.2          | -                |
| N109 glycan, ND2-C1 GlcNAc |            | C8-C    | 111.2              | ALA        | H                    | 3.9          | -                |
| N109 glycan, ND2-C1 GlcNAc |            | O3-CE3  | 112                | TRP        | H                    | 3.9          | -                |
| N109 glycan, O4-C1 GlcNAc  |            | C5-CE2  | 112                | TRP        | H                    | 3.9          | -                |
| N109 glycan, O4-C1 GlcNAc  |            | C6-NE1  | 112                | TRP        | H                    | 4.0          | -                |
| N109 glycan, ND2-C1 GlcNAc |            | O7-ND2  | 112.1              | ASN        | H                    | 3.9          | -                |
| N109 glycan, ND2-C1 GlcNAc |            | O7-CE3  | 112.3              | TRP        | H                    | 3.8          | -                |
| N109 glycan, O4-C1 GlcNAc  |            | C5-CZ2  | 112.3              | TRP        | H                    | 3.9          | -                |
| N89 glycan, O3-C1 Man      |            | O4-CG2  | 116                | ASP        | H                    | 3.9          | -                |
| N89 glycan, O3-C1 Man      |            | O3-CB   | 116                | ASP        | H                    | 3.6          | -                |
| N89 glycan, O3-C1 Man      |            | O4-CB   | 116                | ASP        | H                    | 3.8          | -                |
| N89 glycan, O3-C1 Man      |            | O4-CG2  | 117                | VAL        | H                    | 3.2          | -                |
| N89 glycan, O3-C1 Man      |            | O6-CG2  | 117                | VAL        | H                    | 3.3          | -                |
| N109 glycan, ND2-C1 GlcNAc |            | O6-OG   | 36                 | SER        | L                    | 3.9          | -                |
| N109 glycan, ND2-C1 GlcNAc |            | C6-OG   | 36                 | SER        | L                    | 4.0          | -                |
| N89 glycan, O3-C1 Man      |            | O2-OG1  | 69                 | THR        | L                    | 2.5          | -                |
| N89 glycan, O3-C1 Man      |            | O2-CG2  | 69                 | THR        | L                    | 3.5          | -                |
| N89 glycan, O3-C1 Man      |            | C2-CG2  | 69                 | THR        | L                    | 3.8          | -                |
| N89 glycan, O6-C1 Man      |            | O2-CG2  | 69                 | THR        | L                    | 3.3          | -                |
| N89 glycan, O3-C1 Man      |            | O2-CB   | 69                 | THR        | L                    | 3.5          | -                |
| N89 glycan, O3-C1 Man      |            | C2-OG1  | 69                 | THR        | L                    | 3.6          | -                |
| N167 glycan, ND2-C1 GlcNAc |            | C8-OD2  | 109                | ASP        | L                    | 3.7          | -                |

**Table S3: 19.7E antibody interactions with GP1.** Related to Figure 4. Amino acid interactions at the 19.7E epitope-paratope region were determined using the online-based Epitope Analyzer platform.<sup>12</sup> Glycan contacts were assessed by finding close contacts (<4 Å) of the GPC glycans with 19.7E Fab using ChimeraX<sup>7</sup>.

| GP Residue number          | Amino acid | Atom    | Fab Residue number | Amino Acid | Heavy or light chain | Distance (Å) | Interaction Type |
|----------------------------|------------|---------|--------------------|------------|----------------------|--------------|------------------|
| 92                         | HIS        | CE1-OE2 | 1                  | GLU        | H                    | 3.5          | Van-der-Waals    |
| 104                        | GLU        | CD-OE1  | 1                  | GLU        | H                    | 3.8          | Van-der-Waals    |
| 109                        | ASN        | C-CB    | 114                | SER        | H                    | 3.7          | Van-der-Waals    |
| 109                        | ASN        | C-OD1   | 112                | ASP        | H                    | 3.8          | Van-der-Waals    |
| 109                        | ASN        | CB-CB   | 113                | TRP        | H                    | 4.0          | Van-der-Waals    |
| 109                        | ASN        | ND2-O   | 113                | TRP        | H                    | 3.8          | Hydro-Bond       |
| 109                        | ASN        | O-N     | 113                | TRP        | H                    | 3.4          | Hydro-Bond       |
| 109                        | ASN        | O-N     | 114                | SER        | H                    | 2.9          | Hydro-Bond       |
| 110                        | THR        | C-OD2   | 112                | ASP        | H                    | 3.7          | Van-der-Waals    |
| 110                        | THR        | CG2-CB  | 114                | SER        | H                    | 3.7          | Van-der-Waals    |
| 111                        | SER        | C-OH    | 37                 | TYR        | H                    | 3.5          | Van-der-Waals    |
| 111                        | SER        | CA-OD2  | 112                | ASP        | H                    | 3.6          | Van-der-Waals    |
| 111                        | SER        | N-OD1   | 112                | ASP        | H                    | 3.8          | Hydro-Bond       |
| 111                        | SER        | N-OD2   | 112                | ASP        | H                    | 2.8          | Hydro-Bond       |
| 111                        | SER        | O-CZ    | 107                | ARG        | H                    | 3.7          | Van-der-Waals    |
| 111                        | SER        | O-NH1   | 107                | ARG        | H                    | 3.5          | Hydro-Bond       |
| 111                        | SER        | O-NH2   | 107                | ARG        | H                    | 3.1          | Hydro-Bond       |
| 111                        | SER        | O-OH    | 37                 | TYR        | H                    | 3.7          | Hydro-Bond       |
| 111                        | SER        | OG-NH1  | 107                | ARG        | H                    | 3.8          | Hydro-Bond       |
| 111                        | SER        | OG-OD2  | 112                | ASP        | H                    | 2.8          | Hydro-Bond       |
| 111                        | SER        | OG-OH   | 37                 | TYR        | H                    | 2.8          | Hydro-Bond       |
| 112                        | ILE        | C-CE1   | 37                 | TYR        | H                    | 3.7          | Van-der-Waals    |
| 112                        | ILE        | CA-CB   | 28                 | PHE        | H                    | 3.9          | Hydr-Phbc        |
| 112                        | ILE        | CB-CB   | 28                 | PHE        | H                    | 3.9          | Hydr-Phbc        |
| 112                        | ILE        | CG2-CG2 | 2                  | VAL        | H                    | 3.9          | Hydr-Phbc        |
| 112                        | ILE        | CG2-O   | 27                 | GLY        | H                    | 3.9          | Van-der-Waals    |
| 112                        | ILE        | N-OH    | 37                 | TYR        | H                    | 3.4          | Hydro-Bond       |
| 112                        | ILE        | O-CA    | 29                 | SER        | H                    | 3.7          | Van-der-Waals    |
| 112                        | ILE        | O-N     | 29                 | SER        | H                    | 2.9          | Hydro-Bond       |
| 112                        | ILE        | O-OG    | 29                 | SER        | H                    | 3.8          | Hydro-Bond       |
| 112                        | ILE        | O-OH    | 37                 | TYR        | H                    | 3.4          | Hydro-Bond       |
| 113                        | ILE        | C-OH    | 37                 | TYR        | H                    | 3.4          | Van-der-Waals    |
| 113                        | ILE        | CG1-OG  | 29                 | SER        | H                    | 3.5          | Van-der-Waals    |
| 113                        | ILE        | N-OH    | 37                 | TYR        | H                    | 3.0          | Hydro-Bond       |
| 113                        | ILE        | O-OH    | 37                 | TYR        | H                    | 3.8          | Hydro-Bond       |
| 114                        | ASN        | CB-CE2  | 37                 | TYR        | H                    | 3.7          | Van-der-Waals    |
| 114                        | ASN        | CG-C    | 36                 | SER        | H                    | 4.0          | Van-der-Waals    |
| 114                        | ASN        | N-OH    | 37                 | TYR        | H                    | 3.4          | Hydro-Bond       |
| 114                        | ASN        | ND2-O   | 36                 | SER        | H                    | 3.0          | Hydro-Bond       |
| 114                        | ASN        | OD1-N   | 37                 | TYR        | H                    | 3.9          | Hydro-Bond       |
| 114                        | ASN        | OD1-OH  | 37                 | TYR        | H                    | 4.0          | Hydro-Bond       |
| 115                        | HIS        | CB-OG   | 36                 | SER        | H                    | 3.8          | Van-der-Waals    |
| 115                        | HIS        | ND1-OG  | 36                 | SER        | H                    | 3.7          | Hydro-Bond       |
| 156                        | ASP        | CB-OG   | 29                 | SER        | H                    | 3.4          | Van-der-Waals    |
| 156                        | ASP        | OD2-OG  | 29                 | SER        | H                    | 2.8          | Hydro-Bond       |
| 169                        | SER        | CB-CZ2  | 113                | TRP        | H                    | 4.0          | Van-der-Waals    |
| 172                        | TYR        | CE1-CH2 | 113                | TRP        | H                    | 4.0          | Hydr-Phbc        |
| 216                        | SER        | O-CZ3   | 113                | TRP        | H                    | 4.0          | Van-der-Waals    |
| 217                        | TYR        | C-CE3   | 113                | TRP        | H                    | 4.0          | Van-der-Waals    |
| 218                        | GLN        | CA-CE3  | 113                | TRP        | H                    | 3.8          | Van-der-Waals    |
| 218                        | GLN        | NE2-O   | 111                | TYR        | H                    | 3.1          | Hydro-Bond       |
| 218                        | GLN        | OE1-C   | 112                | ASP        | H                    | 3.7          | Van-der-Waals    |
| 218                        | GLN        | OE1-N   | 113                | TRP        | H                    | 2.8          | Hydro-Bond       |
| 223                        | GLN        | NE2-OE1 | 1                  | GLU        | H                    | 3.3          | Hydro-Bond       |
| 223                        | GLN        | OE1-O   | 27                 | GLY        | H                    | 3.5          | Van-der-Waals    |
| <hr/>                      |            |         |                    |            |                      |              |                  |
| N89 glycan, O4-C1 GlcNAc   |            | O7-CD   | 1                  | GLU        | H                    | 4.0          | -                |
| N89 glycan, O4-C1 GlcNAc   |            | O7-CG   | 1                  | GLU        | H                    | 3.2          | -                |
| N167, O4-C1 GlcNAc         |            | O6-CE1  | 111                | TYR        | H                    | 3.3          | -                |
| N167, O4-C1 GlcNAc         |            | O6-CD1  | 111                | TYR        | H                    | 3.5          | -                |
| N167, O4-C1 GlcNAc         |            | O7-CD2  | 111                | TYR        | H                    | 3.6          | -                |
| N167 glycan, O4-C1 Man     |            | C1-OH   | 111                | TYR        | H                    | 3.7          | -                |
| N167 glycan, O4-C1 Man     |            | C3-OH   | 111                | TYR        | H                    | 3.7          | -                |
| N167, O4-C1 GlcNAc         |            | C2-CD2  | 111                | TYR        | H                    | 3.9          | -                |
| N109 glycan, ND2-C1 GlcNAc |            | C1-CE3  | 113                | TRP        | H                    | 3.7          | -                |
| N109 glycan, ND2-C1 GlcNAc |            | O6-CD2  | 113                | TRP        | H                    | 3.8          | -                |
| N109 glycan, ND2-C1 GlcNAc |            | O6-CE2  | 113                | TRP        | H                    | 3.8          | -                |
| N109 glycan, ND2-C1 GlcNAc |            | O6-CD1  | 113                | TRP        | H                    | 3.9          | -                |
| N109 glycan, ND2-C1 GlcNAc |            | O5-CE3  | 113                | TRP        | H                    | 3.9          | -                |
| N109 glycan, ND2-C1 GlcNAc |            | O6-NE1  | 113                | TRP        | H                    | 3.9          | -                |
| N109 glycan, ND2-C1 GlcNAc |            | O5-CB   | 113                | TRP        | H                    | 3.8          | -                |
| N109 glycan, ND2-C1 GlcNAc |            | O6-CG   | 113                | TRP        | H                    | 3.8          | -                |
| N109 glycan, ND2-C1 GlcNAc |            | C1-CB   | 113                | TRP        | H                    | 4.0          | -                |
| N89 glycan, O6-C1 Man      |            | O4-CG   | 118                | TRP        | H                    | 3.6          | -                |
| N89 glycan, O6-C1 Man      |            | O4-CD1  | 118                | TRP        | H                    | 3.9          | -                |
| N89 glycan, O6-C1 Man      |            | O4-CB   | 118                | TRP        | H                    | 3.6          | -                |
| <hr/>                      |            |         |                    |            |                      |              |                  |
| N89 glycan, O6-C1 Man      |            | C6-CB   | 49                 | ALA        | L                    | 3.7          | -                |
| N89 glycan, O6-C1 Man      |            | O6-CB   | 49                 | ALA        | L                    | 3.8          | -                |
| N89 glycan, O6-C1 Man      |            | O2-CG   | 51                 | LYS        | L                    | 3.8          | -                |
| N167 glycan, O3-C1 Man     |            | C6-OD1  | 108                | ASN        | L                    | 3.1          | -                |
| N167 glycan, O3-C1 Man     |            | O4-C    | 108                | ASN        | L                    | 3.5          | -                |
| N167 glycan, O3-C1 Man     |            | C4-O    | 108                | ASN        | L                    | 3.8          | -                |
| N167 glycan, O3-C1 Man     |            | O6-OD1  | 108                | ASN        | L                    | 3.9          | -                |
| N167 glycan, O3-C1 Man     |            | C6-CG   | 108                | ASN        | L                    | 4.0          | -                |

**Table S4: S370.7 antibody interactions with GPC.** Related to Figure 6. Amino acid interactions at the S370.7 epitope-paratope region were determined using the online-based Epitope Analyzer platform.<sup>12</sup> Glycan contacts were assessed by finding close contacts (<4 Å) of the GPC glycans with S370.7 Fab using ChimeraX.<sup>7</sup>

| GP Residue number          | Amino acid | Atom    | Fab Residue number | Amino Acid | Heavy or light chain | Distance (Å) | Interaction Type |
|----------------------------|------------|---------|--------------------|------------|----------------------|--------------|------------------|
| 268                        | ASP        | CB-CG   | 112.1              | PRO        | H                    | 4.0          | Van-der-Waals    |
| 268                        | ASP        | OD2-CB  | 111.1              | SER        | H                    | 3.9          | Van-der-Waals    |
| 325                        | ARG        | NH1-CB  | 112.4              | VAL        | H                    | 3.7          | Van-der-Waals    |
| 325                        | ARG        | NH1-O   | 112.4              | VAL        | H                    | 3.7          | Hydro-Bond       |
| 325                        | ARG        | NH1-OG  | 64                 | SER        | H                    | 3.8          | Hydro-Bond       |
| 325                        | ARG        | NH2-O   | 112.4              | VAL        | H                    | 3.8          | Hydro-Bond       |
| 360                        | CYS        | O-CG1   | 112.4              | VAL        | H                    | 3.6          | Van-der-Waals    |
| 362                        | PRO        | CD-CD2  | 112.5              | TYR        | H                    | 3.9          | Hydr-Phbc        |
| 362                        | PRO        | CG-CD2  | 112.5              | TYR        | H                    | 3.4          | Hydr-Phbc        |
| 362                        | PRO        | CG-CE2  | 112.5              | TYR        | H                    | 3.8          | Hydr-Phbc        |
| 387                        | LEU        | CD1-CG1 | 111.2              | VAL        | H                    | 3.7          | Hydr-Phbc        |
| 387                        | LEU        | CD1-CG2 | 111.2              | VAL        | H                    | 4.0          | Hydr-Phbc        |
| 389                        | SER        | OG-CE2  | 112.5              | TYR        | H                    | 3.9          | Van-der-Waals    |
| 394                        | LEU        | CD2-CE1 | 112.5              | TYR        | H                    | 3.9          | Hydr-Phbc        |
| 394                        | LEU        | CD2-CE2 | 112.5              | TYR        | H                    | 3.9          | Hydr-Phbc        |
| 394                        | LEU        | CD2-CZ  | 112.5              | TYR        | H                    | 3.6          | Hydr-Phbc        |
| 397                        | THR        | O-CG    | 111                | ARG        | H                    | 3.8          | Van-der-Waals    |
| 398                        | HIS        | C-C     | 111                | ARG        | H                    | 3.8          | Van-der-Waals    |
| 398                        | HIS        | CD2-CD2 | 58                 | HIS        | H                    | 3.9          | Van-der-Waals    |
| 398                        | HIS        | CG-CE1  | 112.5              | TYR        | H                    | 3.9          | Van-der-Waals    |
| 398                        | HIS        | O-C     | 111.1              | SER        | H                    | 3.4          | Van-der-Waals    |
| 398                        | HIS        | O-N     | 111.1              | SER        | H                    | 3.5          | Hydro-Bond       |
| 399                        | PHE        | C-O     | 111                | ARG        | H                    | 3.1          | Van-der-Waals    |
| 399                        | PHE        | CB-CG2  | 111.2              | VAL        | H                    | 3.8          | Hydr-Phbc        |
| 399                        | PHE        | N-O     | 111                | ARG        | H                    | 3.5          | Hydro-Bond       |
| 400                        | SER        | C-O     | 111                | ARG        | H                    | 3.8          | Van-der-Waals    |
| 400                        | SER        | N-O     | 111                | ARG        | H                    | 3.0          | Hydro-Bond       |
| 401                        | ASP        | CA-O    | 111                | ARG        | H                    | 3.6          | Van-der-Waals    |
| 401                        | ASP        | N-O     | 111                | ARG        | H                    | 2.9          | Hydro-Bond       |
| 401                        | ASP        | OD2-N   | 111                | ARG        | H                    | 3.7          | Hydro-Bond       |
| 402                        | ASP        | CG-CB   | 111.1              | SER        | H                    | 4.0          | Van-der-Waals    |
| 402                        | ASP        | CG-N    | 111.2              | VAL        | H                    | 3.9          | Van-der-Waals    |
| 402                        | ASP        | OD2-N   | 111.2              | VAL        | H                    | 2.9          | Hydro-Bond       |
| 269                        | SER        | OG-CE   | 36                 | LYS        | L                    | 3.3          | Van-der-Waals    |
| 269                        | SER        | OG-NZ   | 36                 | LYS        | L                    | 3.0          | Hydro-Bond       |
| 270                        | GLU        | O-CG    | 36                 | LYS        | L                    | 3.4          | Van-der-Waals    |
| 272                        | LYS        | CA-OH   | 38                 | TYR        | L                    | 3.9          | Van-der-Waals    |
| 272                        | LYS        | CB-O    | 29                 | PRO        | L                    | 4.0          | Van-der-Waals    |
| 272                        | LYS        | CD-C    | 37                 | GLN        | L                    | 3.8          | Van-der-Waals    |
| 272                        | LYS        | CD-O    | 28                 | LEU        | L                    | 4.0          | Van-der-Waals    |
| 272                        | LYS        | CD-OD2  | 57                 | ASP        | L                    | 3.4          | Van-der-Waals    |
| 272                        | LYS        | CG-C    | 36                 | LYS        | L                    | 3.9          | Van-der-Waals    |
| 272                        | LYS        | N-O     | 29                 | PRO        | L                    | 3.5          | Hydro-Bond       |
| 272                        | LYS        | N-O     | 36                 | LYS        | L                    | 3.9          | Hydro-Bond       |
| 272                        | LYS        | NZ-O    | 28                 | LEU        | L                    | 2.6          | Hydro-Bond       |
| 272                        | LYS        | NZ-O    | 37                 | GLN        | L                    | 3.1          | Hydro-Bond       |
| 272                        | LYS        | NZ-OD1  | 57                 | ASP        | L                    | 3.6          | Salt-Bridge      |
| 272                        | LYS        | NZ-OD2  | 57                 | ASP        | L                    | 2.8          | Salt-Bridge      |
| 272                        | LYS        | O-OH    | 38                 | TYR        | L                    | 3.5          | Hydro-Bond       |
| 279                        | CYS        | CB-CD   | 36                 | LYS        | L                    | 3.9          | Van-der-Waals    |
| 281                        | THR        | CB-OD1  | 110                | ASP        | L                    | 3.5          | Van-der-Waals    |
| 281                        | THR        | CG2-C   | 109                | SER        | L                    | 3.9          | Van-der-Waals    |
| 281                        | THR        | CG2-NZ  | 36                 | LYS        | L                    | 3.8          | Van-der-Waals    |
| 281                        | THR        | OG1-OD1 | 110                | ASP        | L                    | 2.9          | Hydro-Bond       |
| 283                        | TRP        | CH2-CB  | 109                | SER        | L                    | 3.9          | Van-der-Waals    |
| 283                        | TRP        | CZ3-CG  | 110                | ASP        | L                    | 3.9          | Van-der-Waals    |
| 290                        | LEU        | CD2-CB  | 29                 | PRO        | L                    | 4.0          | Hydr-Phbc        |
| 290                        | LEU        | CD2-CB  | 36                 | LYS        | L                    | 3.9          | Van-der-Waals    |
| 290                        | LEU        | CD2-O   | 26                 | ASP        | L                    | 3.9          | Van-der-Waals    |
| 320                        | LYS        | CE-O    | 110                | ASP        | L                    | 4.0          | Van-der-Waals    |
| 320                        | LYS        | NZ-O    | 110                | ASP        | L                    | 3.8          | Hydro-Bond       |
| 324                        | GLN        | NE2-OG1 | 114                | THR        | L                    | 3.1          | Hydro-Bond       |
| N390 glycan, ND2-C1 GlcNAc |            | C8-O    | 59                 | SER        | H                    | 3.2          | -                |
| N390 glycan, ND2-C1 GlcNAc |            | C8-C    | 59                 | SER        | H                    | 3.8          | -                |
| N390 glycan, ND2-C1 GlcNAc |            | C8-CA   | 63                 | GLY        | H                    | 4.1          | -                |
| N79 glycan, O3-C1 Man      |            | O4-CE2  | 115                | TYR        | L                    | 3.2          | -                |
| N79 glycan, O3-C1 Man      |            | O4-CD2  | 115                | TYR        | L                    | 3.4          | -                |
| N79 glycan, O3-C1 Man      |            | C5-N    | 2                  | TYR        | L                    | 3.9          | -                |
| N79 glycan, O3-C1 Man      |            | O4-N    | 2                  | TYR        | L                    | 3.0          | -                |

**Table S5: 37.2D antibody interactions with GPC.** Related to Figure 6. Amino acid interactions at the 37.2D epitope-paratope region (PDB 7UOT)<sup>10</sup> were determined using the online-based Epitope Analyzer platform.<sup>12</sup> Glycan contacts were assessed by finding close contacts (<4 Å) of the GPC glycans with 37.2D Fab using ChimeraX.<sup>7</sup>

| GP Residue number          | Amino acid | Atom    | Fab Residue number | Amino Acid | Heavy or light chain | Distance (Å) | Interaction Type |
|----------------------------|------------|---------|--------------------|------------|----------------------|--------------|------------------|
| 264                        | TRP        | CH2-CH2 | 112.3              | TRP        | H                    | 3.8          | Hydr-Phbc        |
| 264                        | TRP        | CH2-CZ2 | 112.3              | TRP        | H                    | 4.0          | Hydr-Phbc        |
| 264                        | TRP        | CZ2-CH2 | 112.3              | TRP        | H                    | 3.7          | Hydr-Phbc        |
| 264                        | TRP        | CZ2-CZ2 | 112.3              | TRP        | H                    | 3.5          | Hydr-Phbc        |
| 265                        | THR        | O-NE1   | 112.3              | TRP        | H                    | 3.5          | Hydro-Bond       |
| 267                        | SER        | CA-CD1  | 112.3              | TRP        | H                    | 3.4          | Van-der-Waals    |
| 321                        | GLN        | CG-CH2  | 112.3              | TRP        | H                    | 3.8          | Van-der-Waals    |
| 325                        | ARG        | NE-CZ3  | 112.3              | TRP        | H                    | 3.8          | Van-der-Waals    |
| 62                         | TYR        | CZ-CZ   | 59                 | PHE        | H                    | 3.8          | Hydr-Phbc        |
| 352                        | LYS        | NZ-O    | 111.3              | SER        | H                    | 3.6          | Hydro-Bond       |
| 356                        | ARG        | CZ-O    | 111.3              | SER        | H                    | 3.2          | Van-der-Waals    |
| 356                        | ARG        | CG-O    | 112.4              | GLY        | H                    | 3.4          | Van-der-Waals    |
| 356                        | ARG        | NE-O    | 111.3              | SER        | H                    | 3.7          | Hydro-Bond       |
| 356                        | ARG        | NH1-O   | 111.3              | SER        | H                    | 3.7          | Hydro-Bond       |
| 356                        | ARG        | NH1-O   | 112.4              | GLY        | H                    | 3.4          | Hydro-Bond       |
| 356                        | ARG        | NH2-O   | 111.2              | SER        | H                    | 2.9          | Hydro-Bond       |
| 356                        | ARG        | NH2-O   | 111.3              | SER        | H                    | 3.0          | Hydro-Bond       |
| 356                        | ARG        | NH2-O   | 112.4              | GLY        | H                    | 2.5          | Hydro-Bond       |
| 361                        | ILE        | CD1-CE3 | 112.3              | TRP        | H                    | 3.5          | Hydr-Phbc        |
| 361                        | ILE        | CD1-CZ3 | 112.3              | TRP        | H                    | 3.4          | Hydr-Phbc        |
| 362                        | PRO        | CD-CD1  | 111.1              | TYR        | H                    | 3.7          | Hydr-Phbc        |
| 362                        | PRO        | CD-CE1  | 111.1              | TYR        | H                    | 3.9          | Hydr-Phbc        |
| 362                        | PRO        | CG-CD1  | 111.1              | TYR        | H                    | 3.5          | Hydr-Phbc        |
| 362                        | PRO        | CG-CE1  | 111.1              | TYR        | H                    | 3.8          | Hydr-Phbc        |
| 362                        | PRO        | CG-CG   | 111.1              | TYR        | H                    | 3.8          | Hydr-Phbc        |
| 384                        | LYS        | NZ-OG   | 111.3              | SER        | H                    | 3.6          | Hydro-Bond       |
| 387                        | LEU        | CD1-C   | 111.2              | SER        | H                    | 3.8          | Van-der-Waals    |
| 394                        | LEU        | CD1-CB  | 111.1              | TYR        | H                    | 3.8          | Hydr-Phbc        |
| 394                        | LEU        | CD1-CD2 | 111.1              | TYR        | H                    | 3.6          | Hydr-Phbc        |
| 394                        | LEU        | CD1-CG  | 111.1              | TYR        | H                    | 3.9          | Hydr-Phbc        |
| 394                        | LEU        | CD2-CD2 | 111.1              | TYR        | H                    | 3.9          | Hydr-Phbc        |
| 395                        | ASN        | ND2-CD1 | 64                 | TYR        | H                    | 3.5          | Van-der-Waals    |
| 396                        | GLU        | OE1-ND2 | 62                 | ASN        | H                    | 3.9          | Hydro-Bond       |
| 397                        | THR        | CB-ND2  | 62                 | ASN        | H                    | 3.7          | Van-der-Waals    |
| 397                        | THR        | CB-OG   | 52                 | SER        | H                    | 3.7          | Van-der-Waals    |
| 397                        | THR        | CG2-CB  | 64                 | TYR        | H                    | 4.0          | Van-der-Waals    |
| 397                        | THR        | O-CB    | 109                | PRO        | H                    | 3.4          | Van-der-Waals    |
| 397                        | THR        | O-NE2   | 111                | GLN        | H                    | 3.4          | Hydro-Bond       |
| 397                        | THR        | OG1-OG  | 57                 | SER        | H                    | 2.7          | Hydro-Bond       |
| 398                        | HIS        | C-O     | 110                | ASP        | H                    | 3.7          | Van-der-Waals    |
| 398                        | HIS        | C-OE1   | 111                | GLN        | H                    | 3.9          | Van-der-Waals    |
| 398                        | HIS        | CE1-CH2 | 55                 | TRP        | H                    | 4.0          | Van-der-Waals    |
| 398                        | HIS        | ND1-O   | 110                | ASP        | H                    | 2.8          | Hydro-Bond       |
| 398                        | HIS        | NE2-CE2 | 64                 | TYR        | H                    | 3.8          | Van-der-Waals    |
| 398                        | HIS        | NE2-NH1 | 66                 | ARG        | H                    | 3.5          | Van-der-Waals    |
| 398                        | HIS        | O-CA    | 111.1              | TYR        | H                    | 4.0          | Van-der-Waals    |
| 398                        | HIS        | O-N     | 111.1              | TYR        | H                    | 3.0          | Hydro-Bond       |
| 399                        | PHE        | C-OE1   | 111                | GLN        | H                    | 3.7          | Van-der-Waals    |
| 399                        | PHE        | CA-O    | 111.1              | TYR        | H                    | 3.9          | Van-der-Waals    |
| 399                        | PHE        | N-OE1   | 111                | GLN        | H                    | 4.0          | Hydro-Bond       |
| 400                        | SER        | N-OE1   | 111                | GLN        | H                    | 3.4          | Hydro-Bond       |
| 401                        | ASP        | CA-OE1  | 111                | GLN        | H                    | 3.7          | Van-der-Waals    |
| 401                        | ASP        | CG-OH   | 108                | TYR        | H                    | 3.8          | Van-der-Waals    |
| 401                        | ASP        | N-OE1   | 111                | GLN        | H                    | 3.0          | Hydro-Bond       |
| 401                        | ASP        | OD1-OH  | 108                | TYR        | H                    | 3.1          | Hydro-Bond       |
| 401                        | ASP        | OD2-CZ  | 112.1              | ARG        | H                    | 4.0          | Van-der-Waals    |
| 401                        | ASP        | OD2-NH1 | 112.1              | ARG        | H                    | 3.9          | Salt-Bridge      |
| 401                        | ASP        | OD2-NH2 | 112.1              | ARG        | H                    | 3.0          | Salt-Bridge      |
| 401                        | ASP        | OD2-OH  | 108                | TYR        | H                    | 3.8          | Hydro-Bond       |
| 404                        | GLU        | CD-NZ   | 36                 | LYS        | H                    | 3.2          | Van-der-Waals    |
| 404                        | GLU        | OE1-NZ  | 36                 | LYS        | H                    | 3.1          | Salt-Bridge      |
| 404                        | GLU        | OE2-NZ  | 36                 | LYS        | H                    | 2.6          | Salt-Bridge      |
| 324                        | GLN        | C-CG2   | 36                 | ILE        | L                    | 3.9          | Van-der-Waals    |
| 324                        | GLN        | C-ND2   | 28                 | ASN        | L                    | 4.0          | Van-der-Waals    |
| 324                        | GLN        | O-ND2   | 28                 | ASN        | L                    | 2.8          | Hydro-Bond       |
| 325                        | ARG        | CZ-CD1  | 36                 | ILE        | L                    | 3.5          | Van-der-Waals    |
| 325                        | ARG        | O-ND2   | 28                 | ASN        | L                    | 3.9          | Hydro-Bond       |
| N390 glycan, O4-C1 GlcNac  | O6-NE2     | 72      | GLN                | H          | 3.8                  | -            |                  |
| N395 glycan, ND2-C1 GlcNac | C5-OD1     | 62      | ASN                | H          | 3.8                  | -            |                  |
| N395 glycan, ND2-C1 GlcNac | C6-OD1     | 62      | ASN                | H          | 4                    | -            |                  |
| N395 glycan, ND2-C1 GlcNac | C5-CG      | 62      | ASN                | H          | 3.9                  | -            |                  |
| N395 glycan, ND2-C1 GlcNac | C6-O       | 62      | ASN                | H          | 3.6                  | -            |                  |
| N395 glycan, ND2-C1 GlcNac | O5-OD1     | 62      | ASN                | H          | 3.6                  | -            |                  |
| N395 glycan, ND2-C1 GlcNac | C6-C       | 63      | GLY                | H          | 3.8                  | -            |                  |
| N395 glycan, ND2-C1 GlcNac | C6-N       | 64      | TYR                | H          | 3.7                  | -            |                  |
| N395 glycan, ND2-C1 GlcNac | O5-CB      | 64      | TYR                | H          | 3.8                  | -            |                  |
| N395 glycan, O4-C1 GlcNac  | C8-O       | 62      | ASN                | H          | 3.3                  | -            |                  |
| N395 glycan, C6-O6 Fuc     | C1-O       | 63      | GLY                | H          | 3.5                  | -            |                  |
| N395 glycan, C6-O6 Fuc     | O5-OD1     | 63      | GLY                | H          | 3.6                  | -            |                  |
| N395 glycan, C6-O6 Fuc     | C6-CE1     | 64      | TYR                | H          | 4                    | -            |                  |
| N395 glycan, C6-O6 Fuc     | O5-CA      | 64      | TYR                | H          | 3.8                  | -            |                  |
| N395 glycan, C6-O6 Fuc     | C6-CD1     | 64      | TYR                | H          | 3.9                  | -            |                  |
| N395 glycan, C6-O6 Fuc     | C6-OG1     | 65      | THR                | H          | 3.9                  | -            |                  |
| N395 glycan, C6-O6 Fuc     | O5-N       | 65      | THR                | H          | 4                    | -            |                  |



## References

1. Notredame, C., Higgins, D.G., and Heringa, J. (2000). T-Coffee: A novel method for fast and accurate multiple sequence alignment. *J. Mol. Biol.* *302*, 205–217. 10.1006/jmbi.2000.4042.
2. Cohen-Dvashi, H., Cohen, N., Israeli, H., and Diskin, R. (2015). Molecular Mechanism for LAMP1 Recognition by Lassa Virus. *J. Virol.* *89*, 7584–7592. 10.1128/JVI.00651-15.
3. Israeli, H., Cohen-Dvashi, H., Shulman, A., Shimon, A., and Diskin, R. (2017). Mapping of the Lassa virus LAMP1 binding site reveals unique determinants not shared by other old world arenaviruses. *PLOS Pathog.* *13*, e1006337.
4. Hastie, K.M., Zandonatti, M.A., Kleinfelter, L.M., Heinrich, M.L., Rowland, M.M., Chandran, K., Branco, L.M., Robinson, J.E., Garry, R.F., and Saphire, E.O. (2017). Structural basis for antibody-mediated neutralization of Lassa virus. *Science* *356*, 923–928. 10.1126/science.aam7260.
5. Robert, X., and Gouet, P. (2014). Deciphering key features in protein structures with the new ENDscript server. *Nucleic Acids Res.* *42*, W320-4. 10.1093/nar/gku316.
6. Punjani, A., Rubinstein, J.L., Fleet, D.J., and Brubaker, M.A. (2017). cryoSPARC: algorithms for rapid unsupervised cryo-EM structure determination. *Nat. Methods* *14*, 290–296. 10.1038/nmeth.4169.
7. Pettersen, E.F., Goddard, T.D., Huang, C.C., Meng, E.C., Couch, G.S., Croll, T.I., Morris, J.H., and Ferrin, T.E. (2021). UCSF ChimeraX: Structure visualization for researchers, educators, and developers. *Protein Sci.* *30*, 70–82. 10.1002/pro.3943.
8. Katz, M., Weinstein, J., Eilon-Ashkenazy, M., Gehring, K., Cohen-Dvashi, H., Elad, N., Fleishman, S.J., and Diskin, R. (2022). Structure and receptor recognition by the Lassa virus spike complex. *Nature*. 10.1038/s41586-022-04429-2.
9. Enriquez, A.S., Buck, T.K., Li, H., Norris, M.J., Moon-Walker, A., Zandonatti, M.A., Harkins, S.S., Robinson, J.E., Branco, L.M., Garry, R.F., et al. (2022). Delineating the mechanism of anti-Lassa virus GPC-A neutralizing antibodies. *Cell Rep.* *39*, 110841. <https://doi.org/10.1016/j.celrep.2022.110841>.
10. Li, H., Buck, T., Zandonatti, M., Yin, J., Moon-Walker, A., Fang, J., Koval, A., Heinrich, M.L., Rowland, M.M., Diaz Avalos, R., et al. (2022). A cocktail of protective antibodies subverts the dense glycan shield of Lassa virus. *Sci. Transl. Med.* *14*, eabq0991. 10.1126/scitranslmed.abq0991.
11. Hastie, K.M., Cross, R.W., Harkins, S.S., Zandonatti, M.A., Koval, A.P., Heinrich, M.L., Rowland, M.M., Robinson, J.E., Geisbert, T.W., Garry, R.F., et al. (2019). Convergent Structures Illuminate Features for Germline Antibody Binding and Pan-Lassa Virus Neutralization. *Cell* *178*, 1004-1015.e14. 10.1016/j.cell.2019.07.020.
12. Montiel-Garcia, D., Rojas-Labra, O., Santoyo-Rivera, N., and Reddy, V.S. (2022). Epitope-Analyzer: A structure-based webtool to analyze broadly neutralizing epitopes. *J. Struct. Biol.* *214*, 107839. 10.1016/j.jsb.2022.107839.
